1 T cell activation, highly armed cytotoxic cells and a sharp shift in  
2 monocytes CD300 receptors expression is characteristic of patients with  
3 severe COVID-19

4

5 Olatz Zenarruzabeitia,<sup>1,5</sup> Gabirel Astarloa-Pando,<sup>1,5</sup> Iñigo Terrén,<sup>1</sup> Ane Orrantia,<sup>1</sup>  
6 Raquel Pérez-Garay,<sup>1</sup> Iratxe Seijas-Betolaza,<sup>2</sup> Javier Nieto-Arana,<sup>3</sup> Natale Imaz-Ayo,<sup>4</sup>  
7 Silvia Pérez-Fernández,<sup>4</sup> Eunáte Arana-Arri,<sup>4</sup> and Francisco Borrego<sup>1,6,\*</sup>

8

9 <sup>1</sup>Immunopathology Group, Biocruces Bizkaia Health Research Institute, 48903  
10 Barakaldo, Spain

11 <sup>2</sup>Intensive Care Medicine Service, Cruces University Hospital, Biocruces Bizkaia  
12 Health Research Institute, 48903 Barakaldo, Spain.

13 <sup>3</sup>Infectious Disease Service, Cruces University Hospital, Biocruces Bizkaia Health  
14 Research Institute, 48903 Barakaldo, Spain.

15 <sup>4</sup>Scientific Coordination Facility, Biocruces Bizkaia Health Research Institute, 48903  
16 Barakaldo, Spain.

17 <sup>5</sup>These authors contributed equally

18 <sup>6</sup>Lead Contact

19

20 \*Correspondence: [francisco.borregorabasco@osakidetza.eus](mailto:francisco.borregorabasco@osakidetza.eus)

21

22 **SUMMARY**

23

24 COVID-19 manifests with a wide diversity of clinical phenotypes characterized by  
25 dysfunctional and exaggerated host immune responses. Many results have been  
26 described on the status of the immune system of patients infected with SARS-CoV-2,  
27 but there are still aspects that have not been fully characterized. In this study, we have  
28 analyzed a cohort of patients with mild, moderate and severe disease. We performed  
29 flow cytometric studies and correlated the data with the clinical features and clinical  
30 laboratory values of patients. Both conventional and unsupervised data analyses  
31 concluded that patients with severe disease are characterized, among others, by a higher  
32 state of activation in all T cell subsets, higher expression of perforin and granzyme B in  
33 cytotoxic cells, expansion of adaptive NK cells and the accumulation of activated and  
34 immature dysfunctional monocytes which are identified by a low expression of HLA-  
35 DR and an intriguing abrupt change in the expression pattern of CD300 receptors. More  
36 importantly, correlation analysis showed a strong association between the alterations in  
37 the immune cells and the clinical signs of severity. These results indicate that patients  
38 with severe COVID-19 have a broad perturbation of their immune system, and they will  
39 help to understand the immunopathogenesis of severe COVID-19 as well as could be of  
40 special value for physicians to decide which specific therapeutic options are most  
41 effective for their patients.

42

43

44

45 **Keywords:** COVID-19, CD300, CD300a, CD300c, CD300e, NK cells, T cells,  
46 monocytes, HLA-DR, granzyme B.

## 47 INTRODUCTION

48

49 Severe acute respiratory syndrome coronavirus 2 (SARS-CoV-2) can cause coronavirus  
50 disease 2019 (COVID-19) which, in the worst cases scenario, can lead to severe  
51 manifestations such as acute respiratory distress syndrome, characterized by aggressive  
52 inflammatory responses in the lower part of respiratory tract, and multiple organ failure.

53 A relevant number of symptomatic patients require hospitalization and a portion of  
54 them are admitted to the intensive care unit (ICU), moreover death may occur in a  
55 significant number of cases (Huang et al., 2020; Zhou et al., 2020a). The thrombotic  
56 complications associated with COVID-19 represent a very important problem.  
57 Embolism and thrombosis are frequent clinical features of patients with severe COVID-  
58 19 (Klok et al., 2020; Lodigiani et al., 2020), sometimes despite anticoagulation  
59 therapy. Patients with severe disease have abnormal coagulation characteristics,  
60 including elevated D-dimer levels, and generalized thrombotic microvascular injury  
61 (Rapkiewicz et al., 2020; Tang et al., 2020; Zhou et al., 2020a).

62 In acute respiratory viral infections, pathology can be caused directly by the virus and/or  
63 by a damaging immune response from the host (Blanco-Melo et al., 2020; Moore and  
64 June, 2020; Vabret et al., 2020). In this sense, severe COVID-19 is due not only to the  
65 direct effects of SARS-CoV-2, but also to a misdirected host response with complex  
66 immune dysregulation (Giamarellos-Bourboulis et al., 2020; Kuri-Cervantes et al.,  
67 2020; Laing et al., 2020; Mathew et al., 2020; Su et al., 2020; Zhou et al., 2020b).  
68 Therefore, it is very important to exactly recognize and identify the immunological  
69 signatures that correlate with the severity of the disease, since this aspect undoubtedly  
70 has relevant clinical implications related to patients' stratification and management.

71 From the first publications, the knowledge about the dysfunctional immune response in  
72 COVID-19 is constantly evolving. Most reports on immune dysfunction in COVID-19  
73 patients have focused on severe disease. Hence, patients with severe COVID-19 exhibit  
74 in plasma higher amounts of numerous cytokines and chemokines than less severe cases  
75 (Herold et al., 2020; Del Valle et al., 2020; Yang et al., 2020). Severe manifestations are  
76 caused, in part, by high levels of interleukin (IL)-6 and the subsequent cytokine storm  
77 together with an altered type I interferon (IFN) response with low IFN production and  
78 an altered expression of IFN-regulated genes (Hadjadj et al., 2020; Del Valle et al.,  
79 2020). The cytokine storm is characterized by systemic inflammation, hemodynamic  
80 instability, hyperferritinemia and multiple organ failure (Moore and June, 2020). Many

81 studies of circulating immune cells by flow and mass cytometry and/or single-cell RNA  
82 sequencing have provided valuable insights into immune perturbations in COVID-19  
83 (Carissimo et al., 2020; Giamarellos-Bourboulis et al., 2020; Kuri-Cervantes et al.,  
84 2020; Laing et al., 2020; Mathew et al., 2020; Sánchez-Cerrillo et al., 2020; Schulte-  
85 Schrepping et al., 2020; Silvin et al., 2020; Su et al., 2020; Wilk et al., 2020). Recently,  
86 a multi-omics approach study has identified a major shift between mild and moderate  
87 disease, in which increased inflammatory signaling correlates with clinical metrics of  
88 blood clotting and plasma composition changes, suggesting that moderate disease may  
89 be the most effective situation for therapeutic intervention (Su et al., 2020).

90 Lymphopenia, including T and NK cell lymphopenia, is a characteristic of severe  
91 COVID-19 (Giamarellos-Bourboulis et al., 2020; Zhou et al., 2020a). In addition,  
92 alterations in the T cell compartment of COVID-19 patients have been described (Kuri-  
93 Cervantes et al., 2020; Laing et al., 2020; Mathew et al., 2020; Zhou et al., 2020b).  
94 Among these, an increment in the frequency of activated and proliferating memory CD4  
95 T cells and memory CD8 T cells in subsets of patients have been documented (Mathew  
96 et al., 2020). Also, T cell exhaustion and increased expression of inhibitory receptors on  
97 peripheral T cells have been described (Li et al., 2020; Mathew et al., 2020; Zheng et  
98 al., 2020). Nonetheless, it is important to consider that these inhibitory receptors are  
99 also increased after T cell activation (Mathew et al., 2020). Besides the evidences of T  
100 cell activation in COVID-19 patients, some studies have found decreases in  
101 polyfunctionality or cytotoxicity (Zheng et al., 2020). Other reported alterations in the  
102 T cell compartment include, for example, a decrease in  $\gamma\delta$  T cells (Laing et al., 2020).  
103 Related to B cells, it has been described an increase in the circulating plasmablasts and  
104 in proliferating B cell subsets, among others (Mathew et al., 2020). Alterations in  
105 natural killer (NK) cells during acute SARS-CoV-2 infection have also been reported.  
106 For example, reduced NK cell counts in patients with severe COVID-19 and impaired  
107 degranulating activity and IFN-gamma production in response to classical targets, such  
108 as K562 cells, have been published (Mazzoni et al., 2020; Osman et al., 2020). Other  
109 studies have shown that there is an increase in the frequency of NK cells displaying  
110 inhibitory receptors, such as NKG2A (Demaria et al., 2020; Li et al., 2020; Zheng et al.,  
111 2020). However, others have described a strong activation of both circulating and lung  
112 NK cells and an expansion of adaptive NK cells in patients with severe disease (Jiang et  
113 al., 2020; Maucourant et al., 2020).

114 Diverse immune mechanisms are on place to detect viral replication and protect the  
115 host. Pattern recognition receptors of the innate immune system recognize viral antigens  
116 and virus-induced damage, increasing bone marrow hematopoiesis, the release of  
117 myeloid cells including neutrophils and monocytes, and the secretion of cytokines and  
118 chemokines (Stegelmeier et al., 2019). If the inflammatory condition is not controlled,  
119 then emergency hematopoiesis may lead to bystander tissue damage that with the  
120 cytokine storm causes organ dysfunction. It is well known that the myeloid  
121 compartment is also profoundly altered during SARS-CoV-2 infection, especially in  
122 patients with severe COVID-19 (Mann et al., 2020; Schulte-Schrepping et al., 2020;  
123 Silvin et al., 2020). For example, dendritic cells (DCs) were found to be reduced in  
124 number and functionally impaired and the ratio of conventional DCs (cDCs) to  
125 plasmacytoid DCs (pDCs) was increased in patients with severe disease (Zhou et al.,  
126 2020b). Some authors have found that pDCs and CD141+ cDCs were equally  
127 diminished in patients irrespective of the disease severity, while the decrease in CD1c+  
128 cDCs was more evident in patients with severe COVID-19, suggesting that this specific  
129 cDC subset migrates to the lungs and other locations (Sánchez-Cerrillo et al., 2020).  
130 Regarding circulating monocytes, alterations in the frequency of certain subpopulations  
131 have been described, such as transitional (CD14<sup>++</sup>CD16<sup>+</sup>) and non-classical  
132 (CD14<sup>+</sup>CD16<sup>++</sup>) monocytes (Sánchez-Cerrillo et al., 2020; Schulte-Schrepping et al.,  
133 2020; Silvin et al., 2020). Some have described that loss of non-classical monocytes  
134 could help in the identification of high risk of severe COVID-19 (Silvin et al., 2020).  
135 Patients with severe disease are characterized by an accumulation of dysfunctional  
136 activated monocytes that express low levels of HLA-DR and immature neutrophils,  
137 indicating an emergency myelopoiesis, and an accumulation of these cells in the lungs  
138 (Schulte-Schrepping et al., 2020; Silvin et al., 2020; Vitte et al., 2020). Severe COVID-  
139 19 is also characterized by a profound alteration of neutrophil subsets. Neutrophilia with  
140 immature (CD10<sup>low</sup>CD101<sup>-</sup>) neutrophils, indicative of emergency granulopoiesis, and  
141 dysfunctional granulocytes are characteristics of patients with severe disease (Silvin et  
142 al., 2020). A granulocytic signature has been proposed to identify SARS-CoV-2  
143 infected from non-infected people as well as between severity stages (Vitte et al., 2020).  
144 Severity was correlated with the expression of PD-L1 in granulocytes from patients  
145 with severe COVID-19 (Schulte-Schrepping et al., 2020; Vitte et al., 2020).  
146 Besides all the published data, there are still aspects not fully characterized in COVID-  
147 19 immunopathogenesis. Patients with severe disease exhibit a significant immune

148 dysregulation and the nature of it is not completely understood. An in depth and  
149 complete knowledge of the dysregulated immune response is very important not only  
150 for its therapeutic implications, but also to better understand the immunopathology of  
151 the disease. Therefore, it is essential to entirely define the immune response  
152 characteristics related to disease features and determine at which stage of the disease  
153 specific therapeutic options may be most effective.

154 We have characterized lymphocytes (T, B and NK cells) and monocytes of patients with  
155 mild, moderate and severe disease using flow cytometry-based studies and correlated  
156 the results with clinical features and laboratory data. Comprehensive conventional and  
157 unsupervised analyses of the results showed that, in addition to others, the activation  
158 status of T lymphocytes and an increase in the cytotoxic potential of T and NK cells are  
159 correlated with the degree of the disease severity. Furthermore, we also describe an  
160 alteration in the expression of CD300 molecules in monocytes and granulocytes that, to  
161 our knowledge, was previously unrecognized. This alteration is characterized by an  
162 abrupt change in the expression of this family of receptors between patients with  
163 moderate and severe COVID-19. Altogether, our results may help physicians to make  
164 therapeutic decisions regarding the management of patients with moderate and severe  
165 COVID-19.

166

## 167 RESULTS

168

### 169 SARS-CoV-2 infection: Study design, clinical cohort and clinical data

170 Our aim was to evaluate the impact of acute SARS-CoV-2 infection in circulating  
171 leukocytes. To this end, we performed a cross-sectional study. Forty four patients with  
172 COVID-19 disease were recruited for the study. To correlate laboratory findings,  
173 including frequencies and phenotype of circulating leukocytes and the severity of the  
174 disease, we stratified our cohort of COVID-19 patients into 3 groups of those showing  
175 mild (15 patients), moderate (15 patients) and severe (14 patients) disease. The  
176 demographic, clinical characteristics and clinical laboratory values are summarized in  
177 Table S1 and Table S2. Inclusion and exclusion criteria were followed to guarantee the  
178 homogeneity of the cohort, including age, gender, severity of the disease and time from  
179 the onset of symptoms to sample collection. In addition, twelve healthy controls (HC)  
180 were included in the study.

181 No significant differences were found between COVID-19 patients and HC in relation  
182 to age (median ages of 64 and 59.5, respectively). There were also no significant  
183 differences between the three groups of patients (severe, moderate and mild) in relation  
184 to the number of days from the appearance of symptoms and the sample collection:  
185 median of 8 days for the mild group (range: 0 to 35), 3 days for the moderate group  
186 (range: 0 to 15) and 7 days for the severe group (range: 0 to 21). Regarding the gender  
187 of the participants, 7 (58.33%) men and 5 (41.66%) women participated in the HC  
188 group and 20 men (45.45%) and 24 (54.54%) women in the COVID-19 group (Fig.  
189 1A). As shown in Fig. 1B, and in agreement with previous studies (Huang et al., 2020;  
190 Mann et al., 2020; Del Valle et al., 2020; Zhou et al., 2020a), we observed an increase  
191 in the levels of plasma IL-6, C-reactive protein (CRP) and ferritin in COVID-19  
192 patients in comparison with HC (Fig. 1B). Specifically, 26% of patients exhibited IL-6  
193 levels above the normal range ( $>40$  pg/mL). Interestingly, all HC had IL-6 levels below  
194 the limit of detection ( $<3$  pg/mL), while 69% of patients had  $>3$  pg/mL of IL-6. On the  
195 other hand, 66% of patients exhibited CRP levels above the normal range ( $>11$  mg/L)  
196 and 57% of patients exhibited ferritin levels above the normal range ( $>300$  ng/mL) (Fig.  
197 1B). Furthermore, although white blood cell (WBC) counts were mostly normal in mild  
198 and moderate COVID-19 patients, some moderate and severe patients exhibited high  
199 WBC counts (Fig. 1C). Also, and in accordance with the literature (Hadjadj et al., 2020;  
200 Huang et al., 2020), we observed frequencies and absolute numbers of lymphocytes

201 below the normal values, and frequencies and absolute number of neutrophils above the  
202 normal values associated with the severity of the disease (Fig. 1C). Finally, increased  
203 levels of IL-6 (>40 pg/mL), CRP (>11 mg/L), ferritin (>300 ng/mL), fibrinogen (>400  
204 mg/dL) and D-dimer (>500 ng/mL) and lower levels of hemoglobin (<13 g/dL) were  
205 observed mostly in moderate and severe patients (Fig. 1D).

206 To examine potential associations between these general laboratory values and other  
207 clinical features, we performed correlation analysis (Fig. 1E). The analysis revealed  
208 associations between different degrees of severity with clinical features (oxygen  
209 therapy, bilateral infiltrations), comorbidities (hypertension), laboratory values (CRP,  
210 D-dimer, fibrinogen, hemoglobin), etc. Frequencies and absolute values of different  
211 subsets of WBCs were also correlated with severity degrees. Interestingly, the analysis  
212 did not reveal a correlation between IL-6 levels with other parameters. Thus, COVID-19  
213 patients presented varied and complex clinical phenotypes and laboratory values,  
214 including evidences of inflammation and altered leukocyte counts in many patients.

215

### 216 **SARS-CoV-2 infection is associated with activated CD4 T cells subsets expressing** 217 **higher levels of PD-1 and perforin**

218 We next performed a detailed multiparametric flow cytometry analysis to further  
219 investigate circulating leukocytes status in COVID-19 patients (see gating strategy for  
220 each cell population in Fig. S1). Given the important role of T cells in the defense  
221 against viral infections and in the establishment of an immunological memory, as well  
222 as in the immunopathology and damage that may occur, we studied T cell  
223 subpopulations. We did not observe significant differences in the frequency of the major  
224 T cells subsets, i.e. CD4, CD8 and double negative (DN) neither in the CD4/CD8 ratio  
225 between the patients and compared with the HC (Fig. S2). Four major CD4 T cell  
226 subpopulations were examined by using the combination of CD45RA and CD27 to  
227 define naïve (CD27+CD45RA+), memory (CD27+CD45RA-), effector-memory  
228 (CD27-CD45RA-), and terminal differentiated effector-memory (TEMRA)  
229 (CD27-CD45RA+) cells (Fig. 2A). There were no significant differences in the  
230 frequencies of the four subsets between HC and COVID-19 patients. Nevertheless, the  
231 frequency of CD4 TEMRA cells was highly variable in COVID-19 patients, in which a  
232 subset of them was characterized by a relatively high number of this cell type (Fig. 2A).  
233 Most viral infections induce proliferation and activation of T cells. The latter is detected  
234 by the coexpression of CD38 and HLA-DR (Mathew et al., 2020). We found an



235 expansion in the CD38+HLA-DR+ subset in all the non-naïve CD4 T cell subsets from  
236 COVID-19 patients, more significantly in the severe group (Fig. 2B and Fig. S3A). This  
237 expansion could be antigen-driven activation, as well as bystander activation and  
238 homeostatic proliferation. Nevertheless, the magnitude of CD38+HLA-DR+ cells  
239 expansion varied widely in our cohort and is significantly lower than the one observed  
240 in CD8 T cells (see below). After antigen recognition and activation, T cells up-regulate  
241 the expression of inhibitory receptors, such as programmed cell death-1 (PD-1), with the  
242 aim of preventing an excessive response that, if not properly regulated, could be  
243 harmful to the host (Schönrich and Raftery, 2019). Therefore, in the context of an acute  
244 infection, PD-1 could also be considered an activation marker, while during chronic  
245 stimulation, T cells became progressively dysfunctional and exhausted, and the  
246 expression of PD-1 persists (Schönrich and Raftery, 2019). We studied the expression  
247 of PD-1 on CD4 T cells and found that there was an increase in all non-naïve CD4 T  
248 cells from patients, which was statistically significant in the effector-memory subset  
249 from moderate and severe COVID-19 patients (Fig. 2C and Fig. S3B). Similar to the  
250 CD38+HLA-DR+ cells, the expansion of PD-1+ cells varied widely, but importantly a  
251 strong positive correlation between CD38+HLA-DR+ cells and PD-1+ cells was  
252 observed in COVID-19 patients (Fig. 2D), suggesting the possibility that PD-1  
253 expression on CD4 T cells during acute SARS-CoV-2 infection is more an activation  
254 marker than an exhaustion marker.

255 Given the relevant role of antibodies in the response to SARS-CoV-2, we also analyzed  
256 the circulating T follicular helper (TFH) cells (PD-1+CXCR5+) (Crotty, 2019). We did  
257 not observe a significant increase, except for the moderate group of patients, in the  
258 frequency of TFH in COVID-19 patients (Fig. S3C). Nevertheless, the frequency of  
259 CD38+HLA-DR+ TFH cells was expanded in patients, suggesting that they had a recent  
260 antigen encounter and have emigrated from the germinal center (Crotty, 2019) (Fig.  
261 S3C). In addition, we performed an analysis of B cells and, while the frequencies of  
262 CD27- B cells, which include mostly the naïve subset, tended to increase in COVID-19  
263 patients, the frequencies of CD27+ memory B cells tended to decrease with the disease  
264 severity, although not significantly (Fig. S4A). Contrarily, the frequency of  
265 plasmablasts (CD27+CD38+) increased, except in patients with severe disease (Fig.  
266 S4A). We also observed a significant decrease in CXCR5 (Fig. S4B) and HLA-DR  
267 (Fig. S4C) expression levels in B cells from COVID-19 patients.

268 Cytotoxic CD4 T cells represent an additional mechanism by which CD4 T cells  
269 contribute to immunity. In viral infections, these perforin expressing CD4 T cells have  
270 been shown to play a protective and/or pathologic role (Broadley et al., 2017; Sanchez-  
271 Martinez et al., 2019). Therefore, we measured the expression of perforin in CD4 T  
272 cells from COVID-19 patients (Fig. 2E and Fig. S3D). Results showed that the  
273 frequency of effector-memory and TEMRA CD4 T cells expressing perforin from a  
274 subset of COVID-19 patients was higher than in HC (Fig. 2E). Although the increase in  
275 the frequency of the memory cells that express perforin was not statistically significant  
276 between COVID-19 patients and HC (Fig. 2E), we observed an enhanced perforin  
277 expression per cell basis as shown by an increase in the median fluorescence intensity  
278 (MFI) of perforin<sup>+</sup> cells (Fig. S3D). Altogether, these results suggest that cytotoxic  
279 CD4 T cells may contribute to the clinical course of those patients.

280 To gain more insight, we performed high-dimensional mapping of seven parameters  
281 flow cytometry data in non-naïve CD4 T cells. For that, a t-distributed stochastic  
282 neighbor embedding (tSNE) representation (heatmap and density plot) of the data  
283 highlighted some regions of non-naïve CD4 T cells that were preferentially found in  
284 COVID-19 patients (Fig. 2F). Among these, cells expressing CD45RA and perforin  
285 were expanded in COVID-19 patients. To further define and also quantify these  
286 differences, we performed FlowSOM clustering and compared the expression of the  
287 seven markers to define 12 clusters or populations (or Pop) (Fig. 2G). Using this  
288 approach we identified several populations differentially expressed between HC and  
289 COVID-19 patients (Fig. 2H and Fig. 3SE). For example, Pop10, which identified  
290 TEMRA cells (CD27-CD45RA<sup>+</sup>) expressing perforin, was expanded in patients.  
291 Memory cells (CD27<sup>+</sup>CD45RA<sup>-</sup>) that express PD-1 and CD38 (Pop0) and PD-1, CD38  
292 and HLA-DR (Pop2), as well as CD27-CD45RA<sup>low</sup> expressing PD-1, CD38 and HLA-  
293 DR (Pop6) were also expanded in COVID-19 patients (Fig. 2H). Thus, COVID-19  
294 patients were characterized by expanded populations of activated, PD-1 and perforin  
295 expressing CD4 T cells in a subgroup of patients.

296

297 **SARS-CoV-2 acute infection is associated with CD8 T cell activation in severe**  
298 **patients.**

299 CD8 T cells have a very relevant role in viral infections through their ability to  
300 recognize and kill virus infected cells and in the formation of the immunological  
301 memory. But also, highly differentiated CD8 T cells have been suggested to induce

302 damage in SARS-CoV-2 infected lungs in an antigen-independent manner (AN and  
303 DW, 2020). Therefore, we next examined the four major subpopulations (naïve,  
304 memory, effector-memory and TEMRA). We observed no significant differences in the  
305 frequencies of naïve, memory and TEMRA subsets between HC and COVID-19  
306 patients. Nevertheless, the frequency of CD8 effector-memory cells was significantly  
307 higher in patients with severe disease (Fig. 3A).

308 Then, we determined the activation status of CD8 T cells. We observed that COVID-19  
309 patients exhibited a significant expansion of activated (CD38+HLA-DR+) cells,  
310 especially in the patients with severe disease (Fig. S5A). As in CD4 T cells, this  
311 expansion could be not only antigen-driven activation, but also homeostatic  
312 proliferation and bystander activation. When we looked at the CD8 T cells subsets,  
313 increased frequencies of activated CD8 T cells were also observed in patients, most  
314 significantly in those with severe disease (Fig. 3B). The magnitude of the activated cells  
315 expansion varied widely, although in a significant subset of patients with severe  
316 COVID-19 more than 50% of their memory, effector-memory and TEMRA CD8 T cells  
317 were activated compared to less than 10% in all HC (Fig. 3B). We also studied the  
318 expression of PD-1 on CD8 T cells (Fig. 3C and Fig. S5B) and although there was a  
319 tendency, no significant differences were observed between HC and patients, with the  
320 exception of an expansion of PD-1+ CD8 memory cells in patients with severe disease.  
321 In contrast to the CD4 T cells, we did not observe a correlation between CD38+HLA-  
322 DR+ cells and PD-1+ cells in COVID-19 patients (Fig. S5C), probably suggesting that  
323 PD-1 expression on CD8 T cells is more a marker of exhaustion than of activation.  
324 Nevertheless, more studies are required to confirm this statement.

325 CD8 T cells exert their cytotoxic activity after encountering virus-infected cells by  
326 releasing perforin and granzymes that are contained in their lytic granules (Halle et al.,  
327 2017). We next determine perforin expression in our cohort of COVID-19 patients.  
328 When we looked at the total CD8 T cell population we observed a significant increase  
329 in the frequency of cells containing perforin in patients with severe disease (Fig. S5D).  
330 This could be explained by an increased in the frequency of memory and effector-  
331 memory cells expressing perforin in severe patients (Fig. 3D). Altogether, these results  
332 suggest that an expansion of activated and perforin containing non-naïve CD8 T cells  
333 may contribute to the severity of the COVID-19 disease.

334 Projecting the non-naïve CD8 T cell subsets into the high-dimensional tSNE space  
335 (heatmap and density plot) also identified alterations in the response of these cells

336 during SARS-CoV-2 infection compared with HC (Fig. 3E). Among others, a relevant  
337 expansion of activated non-naïve CD8 T cells was observed, more significantly in  
338 patients with severe disease. To gain more insight into the CD8 T cell alterations, we  
339 again used the FlowSOM clustering tool and compared the expression of several  
340 markers to define 12 populations (or Pop) (Fig. 3F). We were able to identify some  
341 populations that were differentially expressed between COVID-19 patients and HC  
342 (Fig. 3G and S5E). The populations containing the activated cells (Pops 7, 8, 9, 10 and  
343 11) were significantly expanded in patients, especially in those with a severe disease.  
344 Pop7 identified activated memory CD8 T cells that are PD-1+, while Pop10 represented  
345 activated memory CD8 T cells that are PD-1-. Pop8 and Pop9 identified activated  
346 effector-memory CD8 T cells that are PD-1- and PD-1+, respectively (Fig. 3G). Pop11  
347 identified the activated TEMRA cell subset, that was significantly increased in severe  
348 patients, while the frequency of Pop0, which identified the TEMRA non-activated cells,  
349 was the same in HC and COVID-19 patients (Fig. 3G and S5E). Pop1 identified the  
350 non-activated (CD38-HLA-DR-) and PD-1- memory subset that decreased with the  
351 severity of the disease (Fig. S5E). Hence, COVID-19 patients were characterized by an  
352 expansion of non-naïve activated CD8 T cells, including both PD-1+ and PD-1- cells.  
353 We have also analyzed the DN T cells, and in a similar way to what happens with CD4  
354 and CD8 T cells, the activated (HLA-DR+CD38+) and perforin expressing DN T cells  
355 are significantly expanded in COVID-19 patients (Fig. S6).

356

### 357 **Activated monocytes, decreased levels of HLA-DR and a shift in CD300 receptors** 358 **expression pattern correlate with severe COVID-19.**

359 The myeloid cell compartment is profoundly dysregulated in patients with severe  
360 COVID-19 (Mann et al., 2020; Sánchez-Cerrillo et al., 2020; Schulte-Schrepping et al.,  
361 2020; Silvin et al., 2020; Vitte et al., 2020). Among other findings, it has been described  
362 an emergency myelopoiesis with accumulation of dysfunctional and immature  
363 monocytes that are characterized by low expression of HLA-DR and CD163 (Schulte-  
364 Schrepping et al., 2020; Silvin et al., 2020). In relation to the three main monocyte  
365 subpopulations (classical, transitional and non-classical), several authors have reported  
366 that the frequency of the CD14<sup>low</sup>CD16<sup>high</sup> (non-classical) monocyte subpopulation is  
367 decreased in patients with severe disease (Sánchez-Cerrillo et al., 2020; Silvin et al.,  
368 2020). In our cohort, we did not observe significant differences in the three main  
369 monocyte subsets, with the exception of transitional monocytes in patients with

370 moderate disease (Fig. 4A). CD163 is a receptor expressed on monocytes that has been  
371 investigated as a potential inflammation marker in different infectious diseases (Tippett  
372 et al., 2011). We found a significant increase in the percentage of CD163<sup>+</sup> monocytes in  
373 patients with moderate and severe disease (Fig. 4B). This increased frequency was  
374 observed in all the monocyte subsets, with a significant number of patients with  
375 moderate and severe disease exhibiting more than 40% of CD163<sup>+</sup> transitional  
376 monocytes (Fig. 4B). Also, as previously published by others (Giamarellos-Bourboulis  
377 et al., 2020; Schulte-Schrepping et al., 2020; Silvin et al., 2020), we found a gradual  
378 decrease in HLA-DR expression levels in all monocyte subsets that correlated with the  
379 severity of the disease (Fig. 4C).

380 The CD300 molecules are type I transmembrane proteins expressed on the surface of  
381 immune cells that modulate a multitude of signaling pathways and have been found to  
382 be involved in several diseases, including viral infections and sepsis (Borrego, 2013;  
383 Vitallé et al., 2019; Zenarruzabeitia et al., 2015, 2016). Therefore we decided to  
384 determine the expression of the inhibitory receptor CD300a and activating receptors  
385 CD300c and CD300e on monocytes from patients with COVID-19 (Fig. 4D). Results  
386 showed a differential expression of these receptors between HC and patients. Very  
387 interestingly, we observed a sharp shift in the expression of this family of receptors  
388 between moderate and severe disease. Specifically, while the expression levels of  
389 CD300a and CD300e increased in monocytes from patients with mild and moderate  
390 disease, a drastic decrease was observed in patients with a severe form of COVID-19.  
391 This decrease in the expression levels reached similar or lower levels than those  
392 expressed by patients with mild disease and HC (Fig. 4D). The expression of CD300a in  
393 granulocytes (CD66b<sup>+</sup> cells) was similar to monocytes, with an increase in patients with  
394 mild and moderate disease and then a sharp decline in patients with severe COVID-19  
395 (Fig. S7). The expression of CD300c on monocytes exhibited a somewhat opposite  
396 pattern to that of CD300a and CD300e (Fig. 4D). In fact, the expression of this marker  
397 decreased in all patients, and significantly in those with a moderate disease. Although  
398 the mechanism responsible for the altered expression levels of CD300 molecules in  
399 patients with COVID-19 it is not known, these results, along with other observations,  
400 may be of great importance for distinguishing those patients who have a severe disease  
401 from others who have a moderate or mild illness.

402 Next, we performed high-dimensional mapping of the seven parameter flow cytometry  
403 data using tSNE representation (heatmap and density plot) and we observed that some

404 regions were preferentially found in patients when compared with HC (Fig. 5A). Then,  
405 clustering was performed using FlowSOM and 10 clusters or populations (Pop) were  
406 identified and quantified (Fig. 5B). Several populations were differentially expressed  
407 between HC and COVID-19 patients (Fig. 5C and Fig. S8). For example, the classical  
408 monocytes Pop0 and Pop4, with low expression of HLA-DR, CD300a and CD300e,  
409 were significantly expanded in patients with severe disease. Interestingly, Pop0  
410 expressed high levels of the CD300c and Pop4 exhibited low levels of this receptor.  
411 Pop5 also belongs to the classical monocyte subset and is characterized by higher  
412 expression of HLA-DR, low CD300c and medium levels of CD300a and CD300e. In  
413 accordance with the results from conventional analysis, Pop5 was most expanded in  
414 patients with mild and moderate disease, while the frequency of this population did not  
415 change in severe COVID-19 patients when compared with HC. Pop1, which is the  
416 predominant population in HC (approximately 50% of monocytes) and is significantly  
417 reduced in patients, belongs to the classical monocyte subset and is characterized by  
418 high HLA-DR and CD300c expression, intermediate levels of CD300e and high levels  
419 of CD300a. Altogether, monocytes from COVID-19 patients have an activated  
420 phenotype, a gradual loss of HLA-DR expression that correlates with the severity of the  
421 disease and, very interestingly, a shift in the expression of CD300 molecules between  
422 moderate and severe disease.

423

424 **Perforin and granzyme B armed NK cell subsets are expanded in patients with**  
425 **severe disease.**

426 The role of NK cells in the recognition and elimination of virus-infected cells is well  
427 documented, as well in modulating the adaptive immune response (Lam and Lanier,  
428 2017). But also, uncontrolled NK cell activation may contribute to hyper-inflammation  
429 and tissue injury (Li et al., 2012). The exact status of NK cells in SARS-CoV-2  
430 infection is not well elucidated and conflicting results related to their phenotype and  
431 functionality have been published. Several studies in COVID-19 patients have revealed  
432 that circulating NK cells are lower in numbers (Giamarellos-Bourboulis et al., 2020;  
433 Maucourant et al., 2020), displayed an inhibitory-related phenotype and have altered  
434 cytotoxic and immunomodulatory functions (Demaria et al., 2020; Li et al., 2020;  
435 Mazzoni et al., 2020; Osman et al., 2020; Zheng et al., 2020). Single-cell RNA  
436 sequencing studies have corroborated this trend (Wilk et al., 2020). However, other  
437 articles have described a strong activation of both, circulating and lung NK cells

438 measured at protein and RNA levels, as well as an expansion of adaptive NK cells in  
439 patients with severe disease (Jiang et al., 2020; Maucourant et al., 2020). Therefore, we  
440 decided to perform a phenotypical analysis of NK cells from COVID-19 patients. First,  
441 we determined the frequency of the three circulating NK cell subsets, i.e. CD56<sup>bright</sup>,  
442 CD56<sup>dim</sup> and CD56<sup>neg</sup> NK cells. CD56<sup>bright</sup> cells are considered a less mature subset than  
443 CD56<sup>dim</sup> NK cells (Di Vito et al., 2019). Our results showed that there were no  
444 significant differences in the frequencies of the three subsets when we compared HC  
445 with COVID-19 patients (Fig. 6A).

446 Next, we analyzed the expression of perforin and granzyme B in NK cells (Fig. 6B).  
447 Results showed that both CD56<sup>bright</sup> and CD56<sup>dim</sup> NK cells from COVID-19 patients  
448 exhibited higher levels of perforin and granzyme B as determined by the MFI of these  
449 markers. This increase in perforin and granzyme B levels were associated with the  
450 severity of the disease (Fig. 6B), suggesting that NK cells from patients with moderate  
451 and, even more with severe disease, have the potential to eliminate more efficiently  
452 target cells. As a subset, CD56<sup>dim</sup> NK cells continue to differentiate (Di Vito et al.,  
453 2019). During this process, among other phenotypical features, they lose the expression  
454 of NKG2A and sequentially acquire CD57 (Di Vito et al., 2019). Therefore, we  
455 determined the expression of NKG2A and CD57 on CD56<sup>dim</sup> NK cells from HC and  
456 COVID-19 patients to evaluate their maturation status. Results showed that there were  
457 no significant differences in the frequencies of the four subsets between HC and patients  
458 (Fig. 6C). Nevertheless, the increased expression of perforin and granzyme B that  
459 associated with the severity of the disease was also evident in each of the four subsets  
460 (Fig. S9A).

461 We also performed high-dimensional mapping of the eight parameter flow cytometry  
462 data using tSNE representation and it was evident that some regions were preferentially  
463 found in COVID-19 patients when compared with HC (Fig. 6D). To gain more insight  
464 into the NK cell alterations observed in COVID-19, we used the FlowSOM clustering  
465 tool and compared the expression of the eight markers to define 16 populations (Fig.  
466 6E). Using this approach, we were able to identify some populations that were  
467 differentially expressed between COVID-19 patients and HC (Fig. 6F and S9B). Pop6,  
468 Pop7 and Pop11 represented CD56<sup>dim</sup> NK cells with relatively low amount of perforin  
469 and granzyme B expression. The frequency of these three populations was significantly  
470 higher in HC, while patients with severe disease exhibited a lower frequency. Pop6 and  
471 Pop11 are CD57-, while Pop7 is CD57+. Related to the CD56<sup>bright</sup> NK cell subset, both

472 Pop14 and Pop15 were identified. While Pop14 does not express perforin or granzyme  
473 B, Pop 15 expresses high levels of these two cytolytic markers. As expected, the  
474 frequency of Pop14 was very low in patients with severe disease, while Pop15 was  
475 significantly expanded in severe COVID-19.

476 Despite the classification as innate cells, the discovery of memory properties in NK  
477 cells hints the role of this cell type in adaptive immunity and long-term responses  
478 (Cerwenka and Lanier, 2016; Lam and Lanier, 2017). In humans adaptive NK cells  
479 express NKG2C and lack signaling molecules such as FcR $\gamma$  (Fc $\epsilon$ RI $\gamma$ ). It is well known  
480 that infection by cytomegalovirus (CMV) induces the expansion of adaptive NK cells  
481 (Rölle and Brodin, 2016). At the functional level, they have higher expression of  
482 granzyme B, secrete higher levels of IFN- $\gamma$  and TNF, and are capable of mediating  
483 ADCC responses and secrete cytokines against CMV infected cells (Rölle and Brodin,  
484 2016). It has been previously described that in patients with severe COVID-19 there is  
485 an increase in the frequency of adaptive NK cells in the circulation (Maucourant et al.,  
486 2020). Therefore, we studied this NK cell subset in our cohort of patients. First, we  
487 determined the frequencies of NKG2C<sup>+</sup>, FcR $\gamma$ - and CD57<sup>+</sup>NKG2C<sup>+</sup> subsets within the  
488 CD56<sup>dim</sup> NK cells (Fig. 7A). Results showed that there were no significant differences  
489 in the frequency of these subsets, with the exception of an expansion of NKG2C<sup>+</sup> and  
490 CD57<sup>+</sup>NKG2C<sup>+</sup> cells from patients with moderate disease. When we simultaneously  
491 looked at the expression of the NKG2C and FcR $\gamma$  markers, we could distinguish four  
492 subsets: the NKG2C-FcR $\gamma$ <sup>+</sup> subset that represents the conventional NK cells, and the  
493 three different subsets of adaptive NK cells, i.e. NKG2C-FcR $\gamma$ <sup>-</sup>, NKG2C<sup>+</sup>FcR $\gamma$ <sup>-</sup> and  
494 NKG2C<sup>+</sup>FcR $\gamma$ <sup>+</sup> (Fig. 7B). The conventional NKG2C-FcR $\gamma$ <sup>+</sup> subset was the largest  
495 both in patients and HC. The frequency of these four subsets was similar in patients and  
496 HC (Fig. 7B and S10A). Nevertheless, the expression of perforin and granzyme B was  
497 higher in each adaptive NK cell subset from COVID-19 patients when compared with  
498 HC (Fig. S10B).

499 It is well known that human adaptive NK cells are expanded in individuals that are  
500 infected by CMV (Lam and Lanier, 2017; Rölle and Brodin, 2016). Hence, we studied  
501 adaptive NK cells expansion according to the CMV serology status of patients and  
502 healthy controls. As reported by Maucourant et al. (Maucourant et al., 2020), we have  
503 determined that there is an expansion of adaptive CD57<sup>+</sup> NKG2C<sup>+</sup> NK cells when they  
504 are more than 5% of circulating CD56<sup>dim</sup> cells. In addition, we have also determined  
505 that there is an expansion of adaptive FcR $\gamma$ - NK cells when they represent more than



506 7% of the CD56<sup>dim</sup> cells. Results in Fig. 7C shows that CMV-seronegative individuals  
507 do not have expansions of adaptive NK cells, except for one patient with moderate  
508 disease, in which the NKG2C+CD57+ cells represented more than 5%, and another  
509 patient with severe disease, in which the FcR $\gamma$ - cells were more than 7%. When only the  
510 CMV-seropositive individuals were taken into account, we observed a significant  
511 expansion of adaptive NK cells in patients with moderate and severe COVID-19, which  
512 was more pronounced when NKG2C+CD57+ cells were taken into account instead of  
513 FcR $\gamma$ - cells (Fig. 7C).

514 Finally, we performed high-dimensional mapping using tSNE representation and we  
515 observed that some regions were preferentially found in CMV-seropositive individuals  
516 compared with CMV-seronegative donors (Fig. 7D). Then, to better understand the  
517 differences in NK cell subsets between CMV-seropositive and CMV-seronegative  
518 individuals we used the FlowSOM clustering tool and compared the expression of seven  
519 markers to define 8 populations (Fig. 7E). Using this approach, we were able to identify  
520 some populations that were differentially expressed between the two groups of donors  
521 (Fig. 7F and S10C). Specifically, the adaptive NK cells Pop6 and Pop7 were  
522 characterized by the phenotype NKG2C+FcR $\gamma$ -, and while Pop6 was CD57+, Pop7 was  
523 CD57-. As expected, the frequencies of Pop6 and Pop7 were higher in CMV-  
524 seropositive HC and COVID-19 patients, although we did not see significant  
525 differences.

526

### 527 **Statistical analysis reveals the relationships between circulating T cells, NK cells** 528 **and monocytes with disease severity in COVID-19 patients.**

529 We first performed a bivariate analysis of 203 clinical laboratory and flow cytometry  
530 variables (Table S3). We selected the statistically significant variables for a multivariate  
531 analysis. Then, to reduce the number of variables to include in the multivariate analysis  
532 we performed a principal component analysis (PCA) (Fig. 8A). Components 1 to 4  
533 explained around 73.7% of the variance, and components 1 and 2 explained around  
534 60.8% of the variance (Fig. S11A). In Figure S11B the contribution of each variable to  
535 components 1 to 4 is shown. The expression of CD300 molecules in monocytes and of  
536 granzyme B in CD56<sup>bright</sup> NK cells are variables, along with the frequency of  
537 lymphocytes and neutrophils, that significantly contribute to component 1. For  
538 component 2, the CD300 receptors expression in monocytes, frequency of neutrophils  
539 and lymphocytes, along with CRP, fibrinogen, lymphocyte count and PD-1 in CD4

540 effector-memory T cells, are variables that contribute significantly. Given that there are  
541 three categories (mild, moderate and severe) we performed multinomial logistic  
542 regression models. When we compared patients with a mild disease with those with a  
543 moderate or severe disease, results showed that component 1 is significantly different  
544 between patients with mild and severe disease, while component 2 is significantly  
545 different between patients with mild and moderate disease (Fig. 8B, upper panel). On  
546 the other hand, when we compared patients with moderate disease with those with a  
547 mild and severe disease, we could see that component 1 was significantly different  
548 between patients with a moderate and severe disease and, as expected, component 2 was  
549 different between patients with moderate and mild disease (Fig. 8B, lower panel).

550 Next, we performed correlation analysis. A different correlogram pattern was observed  
551 between HC and patients groups when we looked at the correlation between the  
552 significant flow cytometry variables (Fig. S12). Then, the analysis was performed to  
553 look for associations between the general laboratory values, clinical features and  
554 degrees of severity with the significant flow cytometry variables (Fig. 8C). Indeed, the  
555 correlogram revealed many direct and inverse correlations providing a very valuable  
556 insight into the flow cytometry variables that were associated with the degree of  
557 severity. Very importantly, a strong direct association of activated T cells and granzyme  
558 B expression in CD56<sup>bright</sup> NK cells with severe disease was observed. Furthermore, and  
559 as expected, there was a strong direct association between activated T cells and  
560 granzyme B expression in CD56<sup>bright</sup> NK cells with clinical features of severity such as  
561 oxygen therapy, days with oxygen therapy, days in ICU, thrombosis/embolism and  
562 bilateral lung infiltrations. Related to clinical laboratory, we observed a direct  
563 correlation between activated T cells and granzyme B expression in CD56<sup>bright</sup> NK cells  
564 with ferritin, counts and frequency of neutrophils, D-dimer, and CRP, and an inverse  
565 association with hemoglobin and counts and frequency of lymphocytes.

566 On the other hand, a very interesting picture emerged when the expression of CD300  
567 receptors on monocytes was taken into consideration. A positive correlation between  
568 CD300a and CD300e expression with moderate disease was observed. However, a  
569 sharp shift in their correlation was detected in patients with severe disease. In fact, an  
570 inverse correlation between CD300a and CD300e expression in monocytes with other  
571 clinical features of severity was also observed. We also looked at the expression of  
572 HLA-DR in monocytes, and there was also an inverse correlation with clinical features  
573 associated to severity such as days in ICU, dead, CRP, D-dimer, etc. Altogether, these

574 results indicate that activated T cells, high expression of granzyme B in NK cells and a  
575 sharp shift in the expression of CD300 receptors are very significant features of patients  
576 with severe COVID-19.  
577

## 578 **DISCUSSION**

579

580 In this study, we have carried out a phenotypic characterization of circulating immune  
581 cells in order to determine correlates that may help to distinguish between degrees of  
582 severity in COVID-19. In addition, the findings that we have obtained could shed some  
583 light into the underlying mechanisms of the disease immunopathogenesis, especially in  
584 severe cases. Among other findings, an increased activation status of all T cell subsets  
585 (CD4, CD8, circulating TFH and DN cells) and highly armed cytotoxic cells, mostly  
586 NK cells and TEMRA and effector-memory T cells, are characteristics of severe  
587 disease. Furthermore, to our knowledge, we have uncovered a previously unrecognized  
588 alteration and a sharp shift in the pattern of expression of CD300 receptors on  
589 monocytes. Very importantly, conventional and unsupervised analyses lead to very  
590 similar conclusions highlighting the relevance of our findings.

591 A possible limitation of our study is the size of the cohort of patients with COVID-19  
592 (n=44) and HC (n=12). However, and to avoid problems related to the diversity of  
593 participants, we have been very careful in choosing a cohort that is as uniform as  
594 possible before we performed the study. Thus, in this way, it is very important to point  
595 out that there are no significant differences between the groups of patients in relation to  
596 age, gender or between the number of days since the symptoms onset and samples  
597 collection.

598 It is widely accepted that immune dysregulation contributes to the pathology seen in  
599 severe cases of SARS-CoV-2 infection. A consistent finding in many studies, including  
600 ours, is that COVID-19 patients display robust activation of the T cell pool, although a  
601 considerable portion of patients have minimal levels of activation compared to HC  
602 (Mathew et al., 2020). Our study shows that the frequency of activated T cells increases  
603 with the degree of severity of the disease. The frequency of activated memory, effector-  
604 memory and TEMRA CD4, CD8, DN, and even circulating TFH cells, is increased in  
605 patients with severe COVID-19. Furthermore, a very significant correlation was  
606 observed between many of these activated T cell subsets with severe disease while, as  
607 expected, an inverse association was observed with patients that experienced a mild  
608 disease. We also observed that CD4 and CD8 T cells from patients with severe disease  
609 tended to have higher levels of perforin. How these activated and perforin containing T  
610 cells contribute to the disease pathology is not well known. However, it has been  
611 proposed that highly differentiated T cells may induce damage during SARS-CoV-2

612 infection in a mechanism involving the induction of ligands, as for example MICA/B,  
613 for activating NK cell receptors in the respiratory epithelium. The recruited terminally  
614 differentiated T cells, which among other things are characterized by the expression of  
615 high levels of perforin and NK cell receptors, may recognize and induce T cell receptor-  
616 independent killing of epithelial cells in the respiratory tract and lungs (AN and DW,  
617 2020). Therefore, it is tempting to speculate that in patients with severe COVID-19, the  
618 expansion of activated T cells, especially the effector-memory and TEMRA cells, have  
619 a role in the pathology of the disease. To confirm this affirmation, an in depth analysis  
620 of these cell subsets (in blood and tissues) from patients with different degrees of  
621 severity is required, including a complete study of their NK cell receptor repertoire. On  
622 the other hand, we observed that cytotoxic (perforin containing) CD4 T cells are  
623 expanded in a subset of COVID-19 patients. Both protective and pathogenic role for  
624 these cells during viral infection have been proposed (Broadley et al., 2017; Sanchez-  
625 Martinez et al., 2019). Even more, it has been postulated that an expansion of cytotoxic  
626 CD4 T cells drives cardiovascular disease in certain inflammatory conditions and they  
627 are triggered by CMV infection (Broadley et al., 2017). There is no doubt that it is  
628 necessary to determine if these cytotoxic CD4 T cells have some role in tissue damage  
629 and thrombotic complications in COVID-19.

630 Although we did not find a significant increase in the frequency of circulating TFH, it  
631 was possible to observe an expansion in a subset of patients. Nevertheless, circulating  
632 TFH were more activated in severe COVID-19, suggesting that these CD38+HLA-DR+  
633 TFH had a recent antigen encounter and may be providing B cell help (Crotty, 2019),  
634 possibly as a part of an extrafollicular response, which somehow is explained by the  
635 observed low levels of CXCR5 in B cells from patients with severe disease. It has been  
636 shown in other viral infections that activated circulating TFH correlates with blood  
637 plasmablasts frequency (Crotty, 2019). We did not observe such correlation and,  
638 furthermore, we only saw an increase in the plasmablasts frequency in patients with  
639 moderate disease. This is in contrast with other studies (Mathew et al., 2020) and we do  
640 not know the reason for this discrepancy. Nevertheless, it is important to point out that  
641 we have not determined the specific SARS-CoV-2 plasmablast response, but the  
642 frequency of total plasmablasts.

643 Similar to Maucourant et al. (Maucourant et al., 2020), we have also found that  
644 COVID-19 patients exhibited expansions of adaptive NK cells as well as highly armed  
645 NK cells. Considering that adaptive NK cells are not a uniform NK cell subset (Rölle

646 and Brodin, 2016), it is important to point out that we observed the expansions when we  
647 use the two more common gating strategies to identify adaptive NK cells:  
648 CD57+NKG2C<sup>+</sup> cells and FcR $\gamma$ <sup>-</sup> cells. What marker is best for the identification of  
649 adaptive NK cells is a matter of discussion, but recently it has been shown that editing  
650 the FcR $\gamma$  gene reprograms conventional NK cells to display functional and phenotypical  
651 characteristics of adaptive NK cells (Liu et al., 2020). Expansions of adaptive NK cells  
652 occurred mostly, but not exclusively, on those individuals that were CMV-seropositive,  
653 raising the question of a possible CMV reactivation in COVID-19. However, the lack of  
654 proliferation of CMV specific T cells in SARS-CoV-2 infection and the absence of  
655 correlation between the expansions of adaptive NK cells with specific CMV IgG titers  
656 argues against the CMV reactivation as the cause (Maucourant et al., 2020; Sekine et  
657 al., 2020). Nevertheless, more studies are required to define what drives the expansion  
658 of adaptive NK cells in COVID-19 patients.

659 There was an apparent increase in the levels of perforin and granzyme B in NK cells  
660 from COVID-19 patients that correlated with the disease severity. This increased  
661 arming of NK cells was very evident in the CD56<sup>bright</sup> subset, which in patients with  
662 severe COVID-19 expressed high levels of perforin and even higher of granzyme B.  
663 Interestingly, two populations (Pop14 and Pop15) that differed in the expression of  
664 perforin, granzyme B and CD16 were identified within the CD56<sup>bright</sup> NK cells. Some  
665 authors have previously suggested that CD56<sup>bright</sup>CD16<sup>+</sup> NK cells represent a more  
666 mature stage within the CD56<sup>bright</sup> subset (Campos et al., 2015). Therefore, we could  
667 conclude that in severe COVID-19 there is a shift toward a more mature NK cell within  
668 the CD56<sup>bright</sup> cells. On the other hand, we did not observe a difference in the maturation  
669 status of the CD56<sup>dim</sup> subset according to the expression of NKG2A and CD57.

670 Correlation studies showed a strong association of granzyme B expression in CD56<sup>bright</sup>  
671 NK cells with severe disease as shown by clinical features such as bilateral infiltrations,  
672 thrombosis/embolism, oxygen therapy, neutrophilia, etc. A less strong association was  
673 also observed when the granzyme B expression in CD56<sup>dim</sup> NK cells was taken into  
674 account. The presence of these highly armed NK cells in patients with severe disease  
675 may suggest the possibility to eliminate more efficiently target cells, including virus-  
676 infected cells, and activated T cells that may cause immunopathology, and therefore  
677 modulate the adaptive immune response (Waggoner et al., 2012). But also, these NK  
678 cells can cause tissue damage in a way similar to how respiratory syncytial virus causes

679 acute lung damage (Li et al., 2012). Undoubtedly, more studies are required to know  
680 how these two aspects of NK cells contribute to the immunopathogenesis of COVID-19.  
681 A decrease in non-classical monocytes and an increase in the transitional subset have  
682 been associated to a severe and mild COVID-19, respectively (Sánchez-Cerrillo et al.,  
683 2020; Schulte-Schrepping et al., 2020; Silvin et al., 2020). Although we did not find  
684 significant differences between patients and HC in the frequency of monocyte subsets, a  
685 tendency to a diminution in the frequency of the non-classical subset and an increase in  
686 the transitional monocytes was evident. In agreement with previous results  
687 (Giamarellos-Bourboulis et al., 2020; Schulte-Schrepping et al., 2020; Silvin et al.,  
688 2020), we observed a decrease in HLA-DR expression in monocytes. The decrease was  
689 gradual and it was very significant in patients with severe COVID-19. HLA-DR<sup>low</sup>  
690 monocytes are considered dysfunctional and are an established surrogate marker of  
691 immunosuppression in sepsis (Venet et al., 2020). Acute infections trigger an  
692 emergency myelopoiesis that is characterized by the mobilization of immature myeloid  
693 cells, which are linked to immunosuppressive functions (Loftus et al., 2018). Therefore,  
694 it is reasonable to propose that an increment in dysfunctional monocytes and an  
695 emergency myelopoiesis are factors that contribute to the development of severe  
696 disease.

697 The CD300 molecules are type I transmembrane proteins expressed on the surface of  
698 immune cells and are divided in two groups: activating and inhibitory receptors  
699 (Borrego, 2013). CD300 receptors are able to bind different ligands, mostly lipids such  
700 as phosphatidylserine, phosphatidylethanolamine and ceramide (Borrego, 2013; Izawa  
701 et al., 2014; Simhadri et al., 2012; Zenarruzabeitia et al., 2015). They regulate many  
702 signaling pathways, as for example monocyte and neutrophil activation (Alvarez et al.,  
703 2008; Borrego, 2013; Simhadri et al., 2013; Zenarruzabeitia et al., 2015, 2016). The  
704 importance of CD300 molecules in several pathological conditions has been highlighted  
705 by multiple studies describing the role of this family of receptors in allergic disorders,  
706 autoimmune and inflammatory diseases, cancer, sepsis and viral infections (Borrego,  
707 2013; Vitallé et al., 2019; Zenarruzabeitia et al., 2015). In this study we have observed a  
708 very intriguing expression pattern of the CD300 molecules in COVID-19 patients. The  
709 expression of CD300a and CD300e gradually increased in monocytes and granulocytes  
710 from patients with mild and moderate disease. It is well known that activation of  
711 neutrophils and monocytes with pro-inflammatory stimuli, such as LPS and GM-CSF,  
712 increased the expression of CD300a and CD300e (Alvarez et al., 2008; Zenarruzabeitia

713 et al., 2016). Therefore, it is plausible to assume that in patients with moderate and mild  
714 disease the increased expression in these two CD300 receptors is a consequence of the  
715 inflammatory milieu. However, a sudden change in the pattern of CD300a and CD300e  
716 receptors expression happened in patients with severe COVID-19 that exhibited very  
717 low levels of these two molecules. The cause for this sharp shift is not known.  
718 However, some clues could be found in the HL-60 acute myeloid leukemia cell model  
719 to study the differentiation towards monocytes and neutrophils (Alvarez et al., 2008).  
720 Undifferentiated HL-60 cell do not express CD300 molecules, but when neutrophil and  
721 monocyte differentiation was induced, a significant increase in CD300a cell surface  
722 expression was observed, indicating that the CD300a receptor expression is  
723 developmentally regulated (Alvarez et al., 2008). Therefore, a possible explanation for  
724 the sharp decrease in CD300a expression, and also possibly CD300e, is that the  
725 circulating monocytes and granulocytes are more immature (and possibly more  
726 dysfunctional) than those observed in mild and moderate COVID-19. This is somehow  
727 supported by the lower HLA-DR expression in monocytes from patients with severe  
728 disease. Evidently, more studies are required to understand not only the exact  
729 mechanisms involved in the regulation of CD300 receptors expression in COVID-19,  
730 but also the role that they play in this disease. Besides that, the determination of CD300  
731 receptors expression in COVID-19 is very important as the statistical, including PCA  
732 analysis, and correlation studies show.

733 In conclusion, the two important findings of this study were that the unsupervised  
734 analysis obtained similar results and reached similar conclusions than the conventional  
735 analysis, and that the statistical and correlation studies corroborated that several immune  
736 alterations were in close relationship with the severity of the disease as shown by the  
737 clinical features and clinical laboratory data. This study could be improved in the future  
738 by increasing the number of recruited patients, performing longitudinal studies,  
739 analyzing in more depth immune cell subsets, as for example terminal differentiated T  
740 cells and monocytes, from blood and tissues, obtaining more comprehensive clinical  
741 data, etc. Still, our study, along with those published by others, provides a compilation  
742 of immune response data that, at least, could help in two ways: first, by providing  
743 additional light on the immune mechanisms behind the development of severe COVID-  
744 19, and second, with the potential benefit of helping clinicians to decide which  
745 therapeutic approach is better for each patient.

746



## 747 **PATIENTS, MATERIALS AND METHODS**

748

### 749 **Patients and healthy donors**

750 In this study, we used plasma and whole blood samples cryopreserved in Cytodelics  
751 Stabiliser (<http://www.cytodelics.com>) from SARS-CoV-2 infected patients (n=44) and  
752 adult healthy donors (n=12). Patients were recruited at Cruces University Hospital. All  
753 samples were collected through the Basque Biobank for Research  
754 (<https://www.biobancovasco.org>). The Basque Biobank complies with the quality  
755 management, traceability and biosecurity, set out in the Spanish Law 14/2007 of  
756 Biomedical Research and in the Royal Decree 1716/2011. Patients recruited into the  
757 study tested PCR-positive for SARS-CoV-2, except one patient with mild disease, from  
758 March to June 2020 and were classified in 3 different clinical severity groups: mild,  
759 moderate and severe, according to clinical criteria (see Table S1 and S2). All donors  
760 provided written and signed informed consent in accordance with the Declaration of  
761 Helsinki. This study was approved by the Basque Ethics Committee for Research with  
762 Medicines (CEIm-E) with the number CES-BIOEF 2020-13.

763

### 764 **Cell preparation and flow cytometry**

765 From each donor a whole blood sample was collected in EDTA, from which one aliquot  
766 was centrifuged to obtain plasma and another aliquot was frozen using Cytodelics  
767 whole blood cell stabilizer. For extracellular staining, 200µL of blood + stabilizer  
768 mixture thawed at 37°C were incubated with the specific antibodies for 23 min at room  
769 temperature (RT) in the dark. Next, red blood cells were lysed using 2mL of 1X BD  
770 FACS Lysing Solution (BD Biosciences) for 12 min at RT. Cells were washed with  
771 PBS containing 2.5% of bovine serum albumin (BSA) (Sigma-Aldrich) and were  
772 permeabilized and fixed using Cytofix/Cytoperm Plus Kit (BD Biosciences) following  
773 manufacturer's instructions. Then, intracellular staining was performed using the  
774 corresponding antibodies during 30 min at 4°C in the dark. Lastly, cells were washed,  
775 resuspended in 250 µL of PBS and acquired in a LSRFortessa X-20 flow cytometer (BD  
776 Biosciences). Three flow cytometry panels were used to study T and B cells, NK cells  
777 and monocytes (see Table S4).

778

### 779 **Flow cytometry data analysis**

780 FCS 3.0 files were exported from the FACSDiva and imported into FlowJo v.10.7.1. for  
781 subsequent analysis. The following plug-ins were used: DownSample (1.1), tSNE and  
782 FlowSOM (2.6). Manual and automated analyses were performed. For the automated  
783 analysis, events were first downsampled from the gates of interest (CD4 T cells, CD8 T  
784 cells, B cells, monocytes, NK cells and CD56<sup>dim</sup> NK cells) across all samples using  
785 DownSample plug-in. Then, downsampled populations were concatenated for the  
786 analysis. tSNE was run using the parameters indicated in each figure and represented as  
787 heatmap and density plot. FlowSOM was run using the same parameters from the tSNE  
788 panels.

789

### 790 **Clinical laboratory data**

791 Hemograms and serum determinations (D-dimer, ferritin, fibrinogen, CRP, etc.) from  
792 all patients were realized at the clinical laboratory of Cruces University Hospital. In  
793 addition, IL-6 levels and CMV serology were determined in plasma samples, also at the  
794 clinical laboratory of Cruces University Hospital. Samples for all determinations were  
795 obtained the same day than samples for flow cytometry analysis.

796

### 797 **Statistical analysis and data representation**

798 GraphPad Prism v.8.4.3 was used for graphical representation and statistical analysis.  
799 Data were represented as boxplots with the median and 25<sup>th</sup> to 75<sup>th</sup> percentiles, and the  
800 whiskers denote lowest and highest values. Each dot represented a donor. Significance  
801 was determined by the Kruskal-Wallis test adjusting for multiple comparisons using  
802 Dunn's test. For categorical comparisons, the significance was determined by chi-  
803 squared test.

804 Correlation plots between variables were calculated and visualized as correlograms  
805 using R function *corrplot*. Spearman's Rank Correlation coefficient was indicated by  
806 square size and heat scale. Significance was indicated by \*p <0.05, \*\*p <0.01, \*\*\*p  
807 <0.001, and \*\*\*\*p <0.0001. p values were adjusted using the Benjamini & Hochberg  
808 test.

809 Bivariate analyses were performed (Table S3). First, using the Shapiro-Wilks normality  
810 test we determined if variables followed a normal distribution. If they did, the average  
811 and standard deviation were reported, and if they did not have a normal distribution the  
812 median and interquartile range were indicated. To determine statistical significance, we  
813 use the Student's t test if the variable follows a normal distribution and the Mann-

814 Whitney U test otherwise. To take into account multiple comparisons, we also presented  
815 the adjusted p-values using the Benjamini & Hochberg test (Table S3). Multivariate  
816 analysis was performed after selecting the statistically significant variables from  
817 bivariate analysis. To reduce the number of variables to include in the multivariate  
818 analysis we performed a Principal Component Analysis (PCA). Multinomial logistic  
819 regression models were performed to determine the components that were associated  
820 with the disease.  
821

## 822 REFERENCES

- 823 Alvarez, Y., Tang, X., Coligan, J.E., and Borrego, F. (2008). The CD300a (IRp60)  
824 inhibitory receptor is rapidly up-regulated on human neutrophils in response to  
825 inflammatory stimuli and modulates CD32a (FcγRIIa) mediated signaling. *Mol.*  
826 *Immunol.* *45*, 253–258.
- 827 Akbar, A.N., and Gilroy, D.W. (2020). Aging immunity may exacerbate COVID-19.  
828 *Science* *369*, 256-257.
- 829 Blanco-Melo, D., Nilsson-Payant, B.E., Liu, W.-C., Uhl, S., Hoagland, D., Møller, R.,  
830 Jordan, T.X., Oishi, K., Panis, M., Sachs, D., et al. (2020). Imbalanced Host Response  
831 to SARS-CoV-2 Drives Development of COVID-19. *Cell* *181*, 1036–1045.e9.
- 832 Borrego, F. (2013). The CD300 molecules: an emerging family of regulators of the  
833 immune system. *Blood* *121*, 1951–1960.
- 834 Broadley, I., Pera, A., Morrow, G., Davies, K.A., and Kern, F. (2017). Expansions of  
835 Cytotoxic CD4+CD28– T Cells Drive Excess Cardiovascular Mortality in Rheumatoid  
836 Arthritis and Other Chronic Inflammatory Conditions and Are Triggered by CMV  
837 Infection. *Front. Immunol.* *8*.
- 838 Campos, C., López, N., Pera, A., Gordillo, J.J., Hassouneh, F., Tarazona, R., and  
839 Solana, R. (2015). Expression of NKp30, NKp46 and DNAM-1 activating receptors on  
840 resting and IL-2 activated NK cells from healthy donors according to CMV-serostatus  
841 and age. *Biogerontology* *16*, 671–683.
- 842 Carissimo, G., Xu, W., Kwok, I., Abdad, M.Y., Chan, Y.-H., Fong, S.-W., Puan, K.J.,  
843 Lee, C.Y.-P., Yeo, N.K.-W., Amrun, S.N., et al. (2020). Whole blood  
844 immunophenotyping uncovers immature neutrophil-to-VD2 T-cell ratio as an early  
845 marker for severe COVID-19. *Nat. Commun.* *11*, 5243.
- 846 Cerwenka, A., and Lanier, L.L. (2016). Natural killer cell memory in infection,  
847 inflammation and cancer. *Nat. Rev. Immunol.* *16*, 112–123.
- 848 Crotty, S. (2019). T Follicular Helper Cell Biology: A Decade of Discovery and  
849 Diseases. *Immunity* *50*, 1132–1148.
- 850 Demaria, O., Carvelli, J., Batista, L., Thibult, M.-L., Morel, A., André, P., Morel, Y.,  
851 Vély, F., and Vivier, E. (2020). Identification of druggable inhibitory immune  
852 checkpoints on Natural Killer cells in COVID-19. *Cell. Mol. Immunol.* *17*, 995–997.
- 853 Giamarellos-Bourboulis, E.J., Netea, M.G., Rovina, N., Akinosoglou, K., Antoniadou,  
854 A., Antonakos, N., Damoraki, G., Gkavogianni, T., Adami, M.-E., Katsaounou, P., et al.  
855 (2020). Complex Immune Dysregulation in COVID-19 Patients with Severe

- 856 Respiratory Failure. *Cell Host Microbe* 27, 992–1000.e3.
- 857 Hadjadj, J., Yatim, N., Barnabei, L., Corneau, A., Boussier, J., Smith, N., Péré, H.,  
858 Charbit, B., Bondet, V., Chenevier-Gobeaux, C., et al. (2020). Impaired type I  
859 interferon activity and inflammatory responses in severe COVID-19 patients. *Science*  
860 (80-). 369, 718–724.
- 861 Halle, S., Halle, O., and Förster, R. (2017). Mechanisms and Dynamics of T Cell-  
862 Mediated Cytotoxicity In Vivo. *Trends Immunol.* 38, 432–443.
- 863 Herold, T., Jurinovic, V., Arnreich, C., Lipworth, B.J., Hellmuth, J.C., von Bergwelt-  
864 Baidon, M., Klein, M., and Weinberger, T. (2020). Elevated levels of IL-6 and CRP  
865 predict the need for mechanical ventilation in COVID-19. *J. Allergy Clin. Immunol.*  
866 146, 128–136.e4.
- 867 Huang, C., Wang, Y., Li, X., Ren, L., Zhao, J., Hu, Y., Zhang, L., Fan, G., Xu, J., Gu,  
868 X., et al. (2020). Clinical features of patients infected with 2019 novel coronavirus in  
869 Wuhan, China. *Lancet* 395, 497–506.
- 870 Izawa, K., Isobe, M., Matsukawa, T., Ito, S., Maehara, A., Takahashi, M., Yamanishi,  
871 Y., Kaitani, A., Oki, T., Okumura, K., et al. (2014). Sphingomyelin and ceramide are  
872 physiological ligands for human LMIR3/CD300f, inhibiting FcεRI-mediated mast cell  
873 activation. *J. Allergy Clin. Immunol.* 133, 270-3.e1-7.
- 874 Jiang, Y., Wei, X., Guan, J., Qin, S., Wang, Z., Lu, H., Qian, J., Wu, L., Chen, Y.,  
875 Chen, Y., et al. (2020). COVID-19 pneumonia: CD8+ T and NK cells are decreased in  
876 number but compensatory increased in cytotoxic potential. *Clin. Immunol.* 218, 108516.
- 877 Klok, F.A., Kruip, M.J.H.A., van der Meer, N.J.M., Arbous, M.S., Gommers,  
878 D.A.M.P.J., Kant, K.M., Kaptein, F.H.J., van Paassen, J., Stals, M.A.M., Huisman,  
879 M.V., et al. (2020). Incidence of thrombotic complications in critically ill ICU patients  
880 with COVID-19. *Thromb. Res.* 191, 145–147.
- 881 Kuri-Cervantes, L., Pampena, M.B., Meng, W., Rosenfeld, A.M., Ittner, C.A.G.,  
882 Weisman, A.R., Agyekum, R.S., Mathew, D., Baxter, A.E., Vella, L.A., et al. (2020).  
883 Comprehensive mapping of immune perturbations associated with severe COVID-19.  
884 *Sci. Immunol.* 5, eabd7114.
- 885 Laing, A.G., Lorenc, A., del Molino del Barrio, I., Das, A., Fish, M., Monin, L.,  
886 Muñoz-Ruiz, M., McKenzie, D.R., Hayday, T.S., Francos-Quijorna, I., et al. (2020). A  
887 dynamic COVID-19 immune signature includes associations with poor prognosis. *Nat.*  
888 *Med.* 26, 1623–1635.
- 889 Lam, V.C., and Lanier, L.L. (2017). NK cells in host responses to viral infections. *Curr.*

- 890 Opin. Immunol. *44*, 43–51.
- 891 Li, F., Zhu, H., Sun, R., Wei, H., and Tian, Z. (2012). Natural Killer Cells Are Involved  
892 in Acute Lung Immune Injury Caused by Respiratory Syncytial Virus Infection. *J.*  
893 *Viol.* *86*, 2251–2258.
- 894 Li, M., Guo, W., Dong, Y., Wang, X., Dai, D., Liu, X., Wu, Y., Li, M., Zhang, W.,  
895 Zhou, H., et al. (2020). Elevated Exhaustion Levels of NK and CD8<sup>+</sup> T Cells as  
896 Indicators for Progression and Prognosis of COVID-19 Disease. *Front. Immunol.* *11*.
- 897 Liu, W., Scott, J.M., Langguth, E., Chang, H., Park, P.H., and Kim, S. (2020). FcR $\gamma$   
898 Gene Editing Reprograms Conventional NK Cells to Display Key Features of Adaptive  
899 Human NK Cells. *IScience* *23*, 101709.
- 900 Lodigiani, C., Iapichino, G., Carenzo, L., Cecconi, M., Ferrazzi, P., Sebastian, T.,  
901 Kucher, N., Studt, J.-D., Sacco, C., Bertuzzi, A., et al. (2020). Venous and arterial  
902 thromboembolic complications in COVID-19 patients admitted to an academic hospital  
903 in Milan, Italy. *Thromb. Res.* *191*, 9–14.
- 904 Loftus, T.J., Mohr, A.M., and Moldawer, L.L. (2018). Dysregulated myelopoiesis and  
905 hematopoietic function following acute physiologic insult. *Curr. Opin. Hematol.* *25*, 37–  
906 43.
- 907 Mann, E.R., Menon, M., Knight, S.B., Konkkel, J.E., Jagger, C., Shaw, T.N., Krishnan,  
908 S., Rattray, M., Ustianowski, A., Bakerly, N.D., et al. (2020). Longitudinal immune  
909 profiling reveals key myeloid signatures associated with COVID-19. *Sci. Immunol.* *5*,  
910 eabd6197.
- 911 Mathew, D., Giles, J.R., Baxter, A.E., Oldridge, D.A., Greenplate, A.R., Wu, J.E.,  
912 Alanio, C., Kuri-Cervantes, L., Pampena, M.B., D'Andrea, K., et al. (2020). Deep  
913 immune profiling of COVID-19 patients reveals distinct immunotypes with therapeutic  
914 implications. *Science* (80-. ). *369*, eabc8511.
- 915 Maucourant, C., Filipovic, I., Ponzetta, A., Aleman, S., Cornillet, M., Hertwig, L.,  
916 Strunz, B., Lentini, A., Reinius, B., Brownlie, D., et al. (2020). Natural killer cell  
917 immunotypes related to COVID-19 disease severity. *Sci. Immunol.* *5*, eabd6832.
- 918 Mazzoni, A., Salvati, L., Maggi, L., Capone, M., Vanni, A., Spinicci, M., Mencarini, J.,  
919 Caporale, R., Peruzzi, B., Antonelli, A., et al. (2020). Impaired immune cell cytotoxicity  
920 in severe COVID-19 is IL-6 dependent. *J. Clin. Invest.* *130*, 4694–4703.
- 921 Moore, J.B., and June, C.H. (2020). Cytokine release syndrome in severe COVID-19.  
922 *Science* (80-. ). *368*, 473–474.
- 923 Osman, M., Faridi, R.M., Sliagl, W., Shabani-Rad, M.-T., Dharmani-Khan, P., Parker,

- 924 A., Kalra, A., Tripathi, M.B., Storek, J., Cohen Tervaert, J.W., et al. (2020). Impaired  
925 natural killer cell counts and cytolytic activity in patients with severe COVID-19. *Blood*  
926 *Adv.* *4*, 5035–5039.
- 927 Rapkiewicz, A. V., Mai, X., Carsons, S.E., Pittaluga, S., Kleiner, D.E., Berger, J.S.,  
928 Thomas, S., Adler, N.M., Charytan, D.M., Gasmi, B., et al. (2020). Megakaryocytes and  
929 platelet-fibrin thrombi characterize multi-organ thrombosis at autopsy in COVID-19: A  
930 case series. *EClinicalMedicine* *24*, 100434.
- 931 Rölle, A., and Brodin, P. (2016). Immune Adaptation to Environmental Influence: The  
932 Case of NK Cells and HCMV. *Trends Immunol.* *37*, 233–243.
- 933 Sánchez-Cerrillo, I., Landete, P., Aldave, B., Sánchez-Alonso, S., Sánchez-Azofra, A.,  
934 Marcos-Jiménez, A., Ávalos, E., Alcaraz-Serna, A., de Los Santos, I., Mateu-Albero,  
935 T., et al. (2020). COVID-19 severity associates with pulmonary redistribution of CD1c+  
936 DCs and inflammatory transitional and nonclassical monocytes. *J. Clin. Invest.* *130*,  
937 6290–6300.
- 938 Sanchez-Martinez, A., Perdomo-Celis, F., Acevedo-Saenz, L., Rugeles, M.T., and  
939 Velilla, P.A. (2019). Cytotoxic CD4+ T-cells during HIV infection: Targets or  
940 weapons? *J. Clin. Virol.* *119*, 17–23.
- 941 Schönrich, G., and Raftery, M.J. (2019). The PD-1/PD-L1 Axis and Virus Infections: A  
942 Delicate Balance. *Front. Cell. Infect. Microbiol.* *9*.
- 943 Schulte-Schrepping, J., Reusch, N., Paclik, D., Baßler, K., Schlickeiser, S., Zhang, B.,  
944 Krämer, B., Krammer, T., Brumhard, S., Bonaguro, L., et al. (2020). Severe COVID-19  
945 Is Marked by a Dysregulated Myeloid Cell Compartment. *Cell* *182*, 1419–1440.e23.
- 946 Sekine, T., Perez-Potti, A., Rivera-Ballesteros, O., Strålin, K., Gorin, J.-B., Olsson, A.,  
947 Llewellyn-Lacey, S., Kamal, H., Bogdanovic, G., Muschiol, S., et al. (2020). Robust T  
948 Cell Immunity in Convalescent Individuals with Asymptomatic or Mild COVID-19.  
949 *Cell* *183*, 158–168.e14.
- 950 Silvin, A., Chapuis, N., Dunsmore, G., Goubet, A.-G., Dubuisson, A., Derosa, L.,  
951 Almire, C., Hénon, C., Kosmider, O., Droin, N., et al. (2020). Elevated Calprotectin and  
952 Abnormal Myeloid Cell Subsets Discriminate Severe from Mild COVID-19. *Cell* *182*,  
953 1401–1418.e18.
- 954 Simhadri, V.R., Andersen, J.F., Calvo, E., Choi, S.-C., Coligan, J.E., and Borrego, F.  
955 (2012). Human CD300a binds to phosphatidylethanolamine and phosphatidylserine, and  
956 modulates the phagocytosis of dead cells. *Blood* *119*, 2799–2809.
- 957 Simhadri, V.R., Mariano, J.L., Gil-Krzewska, A., Zhou, Q., and Borrego, F. (2013).

958 CD300c is an Activating Receptor Expressed on Human Monocytes. *J. Innate Immun.*  
959 *5*, 389–400.

960 Stegelmeier, A.A., van Vloten, J.P., Mould, R.C., Klafuric, E.M., Minott, J.A.,  
961 Wootton, S.K., Bridle, B.W., and Karimi, K. (2019). Myeloid Cells during Viral  
962 Infections and Inflammation. *Viruses 11*, 168.

963 Su, Y., Chen, D., Yuan, D., Lausted, C., Choi, J., Dai, C.L., Voillet, V., Duvvuri, V.R.,  
964 Scherler, K., Troisch, P., et al. (2020). Multi-Omics Resolves a Sharp Disease-State  
965 Shift between Mild and Moderate COVID-19. *Cell 183*, 1479–1495.e20.

966 Tang, N., Li, D., Wang, X., and Sun, Z. (2020). Abnormal coagulation parameters are  
967 associated with poor prognosis in patients with novel coronavirus pneumonia. *J.*  
968 *Thromb. Haemost. 18*, 844–847.

969 Tippett, E., Cheng, W.-J., Westhorpe, C., Cameron, P.U., Brew, B.J., Lewin, S.R.,  
970 Jaworowski, A., and Crowe, S.M. (2011). Differential Expression of CD163 on  
971 Monocyte Subsets in Healthy and HIV-1 Infected Individuals. *PLoS One 6*, e19968.

972 Vabret, N., Britton, G.J., Gruber, C., Hegde, S., Kim, J., Kuksin, M., Levantovsky, R.,  
973 Malle, L., Moreira, A., Park, M.D., et al. (2020). Immunology of COVID-19: Current  
974 State of the Science. *Immunity 52*, 910–941.

975 Del Valle, D.M., Kim-Schulze, S., Huang, H.-H., Beckmann, N.D., Nirenberg, S.,  
976 Wang, B., Lavin, Y., Swartz, T.H., Madduri, D., Stock, A., et al. (2020). An  
977 inflammatory cytokine signature predicts COVID-19 severity and survival. *Nat. Med.*  
978 *26*, 1636–1643.

979 Venet, F., Demaret, J., Gossez, M., and Monneret, G. (2020). Myeloid cells in sepsis-  
980 acquired immunodeficiency. *Ann. N. Y. Acad. Sci.*

981 Vitallé, J., Terrén, I., Orrantia, A., Zenarruzabeitia, O., and Borrego, F. (2019). CD300  
982 receptor family in viral infections. *Eur. J. Immunol. 49*, 364–374.

983 Di Vito, C., Mikulak, J., and Mavilio, D. (2019). On the Way to Become a Natural  
984 Killer Cell. *Front. Immunol. 10*.

985 Vitte, J., Diallo, A.B., Boumaza, A., Lopez, A., Michel, M., Allardet-Servent, J.,  
986 Mezouar, S., Sereme, Y., Busnel, J.-M., Miloud, T., et al. (2020). A Granulocytic  
987 Signature Identifies COVID-19 and Its Severity. *J. Infect. Dis. 222*, 1985–1996.

988 Waggoner, S.N., Cornberg, M., Selin, L.K., and Welsh, R.M. (2012). Natural killer cells  
989 act as rheostats modulating antiviral T cells. *Nature 481*, 394–398.

990 Wilk, A.J., Rustagi, A., Zhao, N.Q., Roque, J., Martínez-Colón, G.J., McKechnie, J.L.,  
991 Ivison, G.T., Ranganath, T., Vergara, R., Hollis, T., et al. (2020). A single-cell atlas of



992 the peripheral immune response in patients with severe COVID-19. *Nat. Med.* *26*,  
993 1070–1076.

994 Yang, Y., Shen, C., Li, J., Yuan, J., Wei, J., Huang, F., Wang, F., Li, G., Li, Y., Xing,  
995 L., et al. (2020). Plasma IP-10 and MCP-3 levels are highly associated with disease  
996 severity and predict the progression of COVID-19. *J. Allergy Clin. Immunol.* *146*, 119–  
997 127.e4.

998 Zenarruzabeitia, O., Vitallé, J., Eguizabal, C., Simhadri, V.R., and Borrego, F. (2015).  
999 The Biology and Disease Relevance of CD300a, an Inhibitory Receptor for  
1000 Phosphatidylserine and Phosphatidylethanolamine. *J. Immunol.* *194*, 5053–5060.

1001 Zenarruzabeitia, O., Vitallé, J., García-Obregón, S., Astigarraga, I., Eguizabal, C.,  
1002 Santos, S., Simhadri, V.R., and Borrego, F. (2016). The expression and function of  
1003 human CD300 receptors on blood circulating mononuclear cells are distinct in neonates  
1004 and adults. *Sci. Rep.* *6*, 32693.

1005 Zheng, M., Gao, Y., Wang, G., Song, G., Liu, S., Sun, D., Xu, Y., and Tian, Z. (2020).  
1006 Functional exhaustion of antiviral lymphocytes in COVID-19 patients. *Cell. Mol.*  
1007 *Immunol.* *17*, 533–535.

1008 Zhou, F., Yu, T., Du, R., Fan, G., Liu, Y., Liu, Z., Xiang, J., Wang, Y., Song, B., Gu,  
1009 X., et al. (2020a). Clinical course and risk factors for mortality of adult inpatients with  
1010 COVID-19 in Wuhan, China: a retrospective cohort study. *Lancet* *395*, 1054–1062.

1011 Zhou, R., To, K.K.-W., Wong, Y.-C., Liu, L., Zhou, B., Li, X., Huang, H., Mo, Y., Luk,  
1012 T.-Y., Lau, T.T.-K., et al. (2020b). Acute SARS-CoV-2 Infection Impairs Dendritic Cell  
1013 and T Cell Responses. *Immunity* *53*, 864–877.e5.

1014

1015

1016

1017 **Acknowledgements:** We thank all patients and healthy controls who participated in this  
1018 study and the staff from the Basque Biobank for Research. This work was supported by  
1019 a grant from the “Agencia Estatal de Investigación” Project PID2019-109583RB-  
1020 I00/AEI/10.13039/501100011033. OZ is recipient of a postdoctoral contract funded by  
1021 “Instituto de Salud Carlos III-Contratos Sara Borrell 2017 (CD17/0128)” and the  
1022 European Social Fund (ESF)-The ESF invests in your future. GA-P is recipient of a  
1023 fellowship from the BBK Fundazioa (1543/2006\_0001) and from the Jesús de Gangoiti  
1024 Barrera Foundation (FJGB20/002). IT is recipient of a predoctoral contract funded by  
1025 the Department of Education, Basque Government (PRE\_2019\_2\_0109). AO is  
1026 recipient of a fellowship from the Jesús de Gangoiti Barrera Foundation (FJGB19/002).  
1027 FB is an Ikerbasque Research Professor, Ikerbasque, Basque Foundation for Science.

1028

1029 **Author contribution:** FB conceived the project; OZ and FB designed experiments; IS-  
1030 B, JN-A, NI-A, and EA-A obtained the clinical samples and clinical data from COVID-  
1031 19 patients; OZ and FB obtained samples from healthy controls; RP-G determined IL-6  
1032 and CMV serology from patients and healthy controls; OZ stained and acquired flow  
1033 cytometry samples; GA-P, and FB performed flow cytometry analysis; GA-P, and SP-F  
1034 performed computational and statistical analysis; GA-P, SP-F and FB compiled figures;  
1035 OZ, GA-P, IT, and AO provided intellectual input; FB wrote the manuscript; all authors  
1036 reviewed the manuscript.

1037

1038 **Declaration of interests:** the authors declare that the research was conducted in the  
1039 absence of any commercial or financial relationships that could be construed as a  
1040 potential conflict of interest.

1041

1042

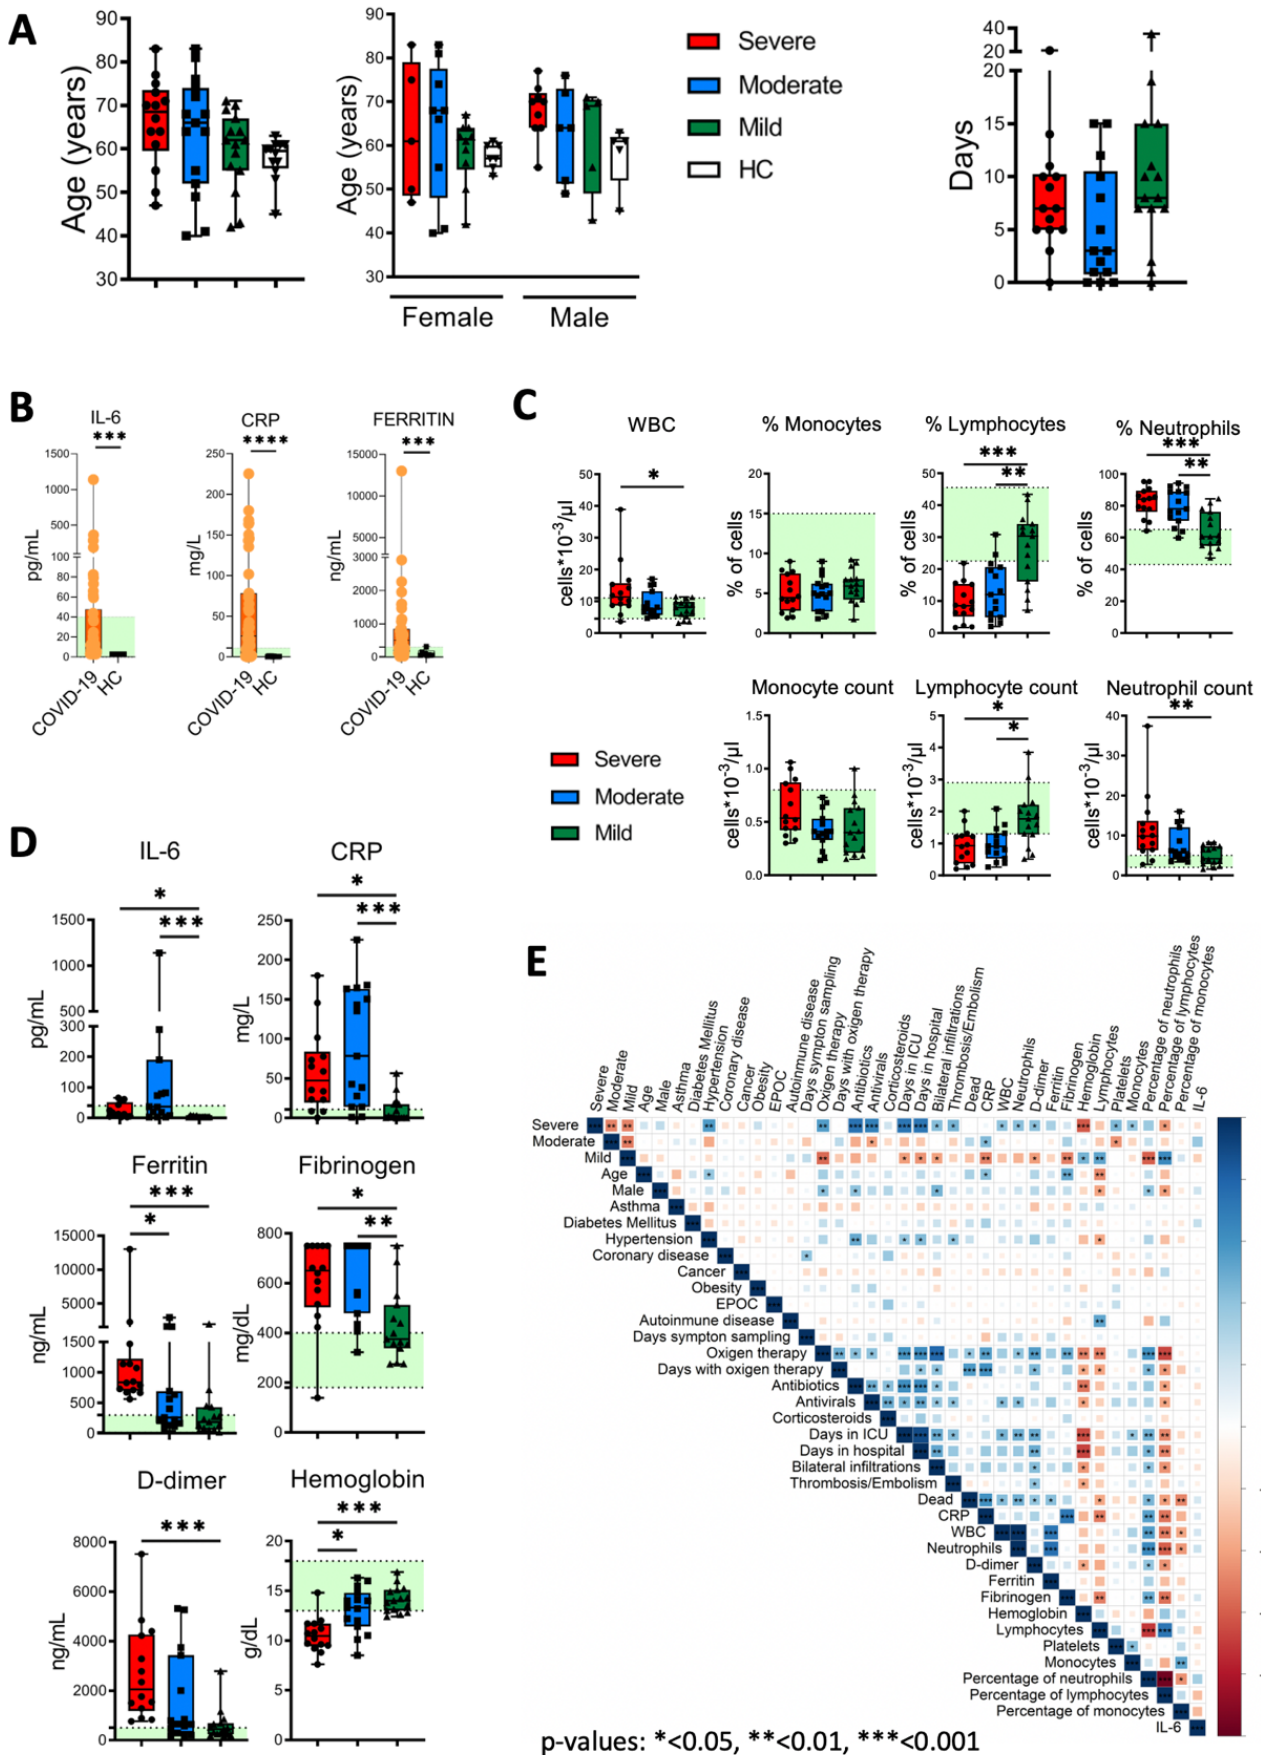

1044 **Fig. 1. Clinical features of patients, quantification of leukocyte subsets and**  
1045 **inflammation markers. (A)** Left: age and gender distribution of patient cohorts in this  
1046 study, including healthy controls (HC) and patients with mild (green), moderate (blue)  
1047 and severe (red) COVID-19. Right: days from symptom onset to sample collection. **(B)**  
1048 Plasma levels of IL-6, C reactive protein (CRP) and ferritin in HC and COVID-19  
1049 patients. The ranges of normal clinical laboratory values are represented in light green.  
1050 **(C)** White blood cells (WBC) counts, leukocyte subsets frequencies and counts in  
1051 patients with mild, moderate and severe COVID-19. The light green region represents  
1052 the normal range for healthy people in the clinical laboratory. **(D)** Plasma levels of IL-6,  
1053 CRP, ferritin, fibrinogen, D-dimer and hemoglobin in COVID-19 patients. Normal  
1054 clinical laboratory values are represented in light green. **(E)** Correlogram showing  
1055 Spearman correlation of the indicated clinical features for COVID-19 patients. Data in  
1056 Fig. 1A, 1C and 1D are represented as boxplot graphs with the median and 25<sup>th</sup> to 75<sup>th</sup>  
1057 percentiles, and the whiskers denote lowest and highest values. Each dot represents a  
1058 donor. Significance was determined by the Kruskal-Wallis test followed by Dunn's  
1059 multiple comparison test. \*p <0.05, \*\*p <0.01, and \*\*\*p <0.001.  
1060

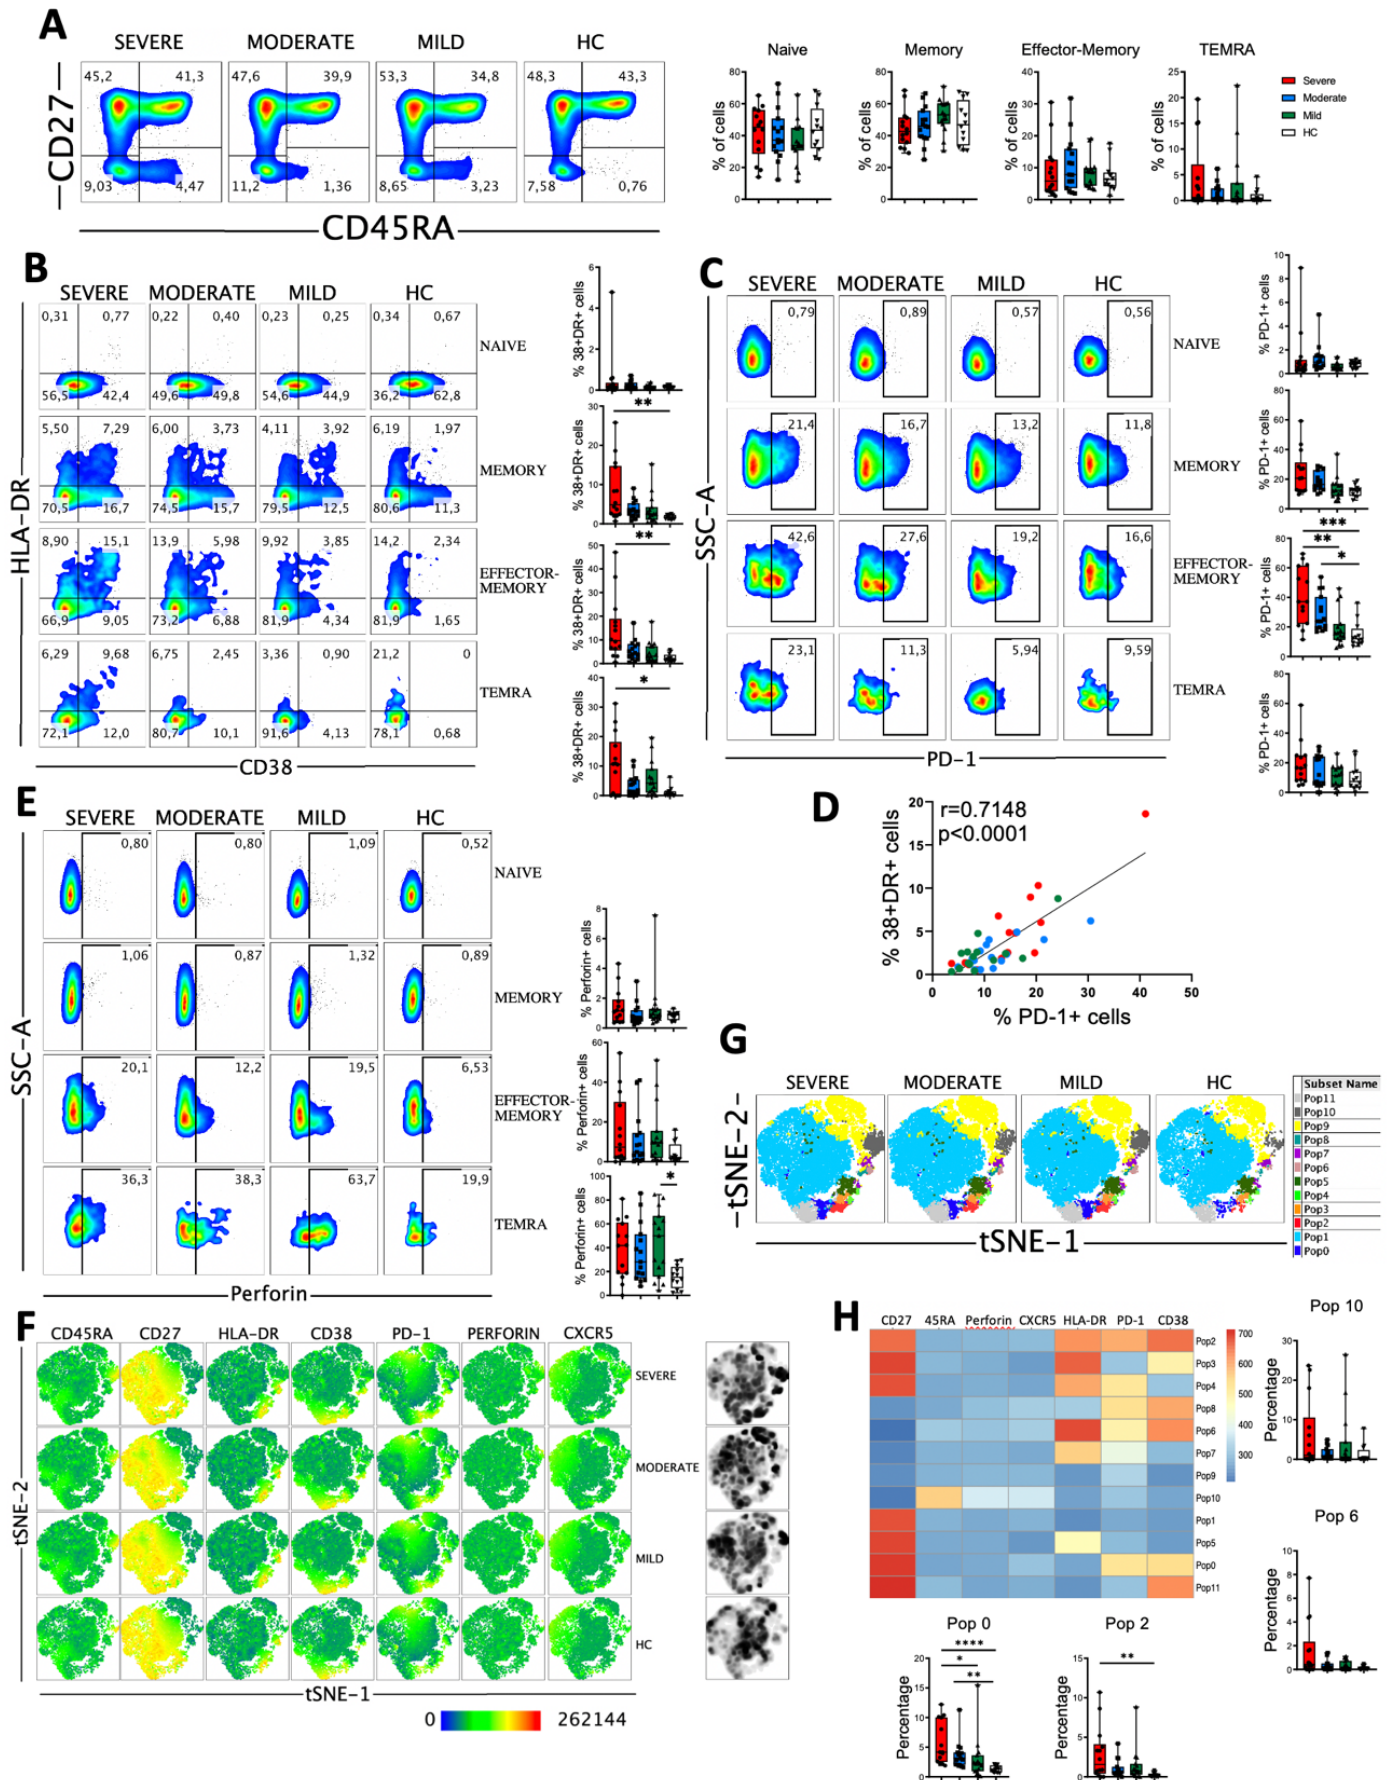

1062 **Fig. 2. CD4 T cell subsets, activation status and perforin expression in COVID-19**  
1063 **patients.** (A) Left: pseudocolor plots of concatenated peripheral CD4 T cells from  
1064 healthy controls (HC) and patients with mild, moderate and severe disease. Four cell  
1065 subsets were identified: naïve (CD27+CD45RA+), memory (CD27+CD45RA-),  
1066 effector-memory (CD27-CD45RA-), and terminal differentiated effector-memory  
1067 (TEMRA) (CD27-CD45RA+). Numbers in the quadrants are the average of each  
1068 subset. Right: boxplot graphs representation of the data. (B). Pseudocolor plots of  
1069 concatenated peripheral CD4 T cells from HC and COVID-19 patients and boxplot  
1070 graphs of the frequencies of activated naïve, memory, effector-memory and TEMRA  
1071 cells. Numbers in the quadrants are the average of each subset. Activated T cells are  
1072 identified by the coexpression of CD38 and HLA-DR. (C) Pseudocolor plots of  
1073 concatenated peripheral CD4 T cells and boxplot graphs showing the frequencies of PD-  
1074 1+ naïve, memory, effector-memory and TEMRA cells. Numbers in the gates are the  
1075 average of PD-1+ cells in each subset. (D) Spearman correlation of activated  
1076 (CD38+HLA-DR+) with PD-1+ CD4 T cells from patients with mild, moderate and  
1077 severe COVID-19. (E) Pseudocolor plots of concatenated peripheral CD4 T cells and  
1078 boxplot graphs of the frequencies of perforin positive naïve, memory, effector-memory  
1079 and TEMRA cells. Numbers in the gates are the average of perforin positive cells in  
1080 each subset. (F) tSNE projection of the indicated markers and density plots in non-naïve  
1081 CD4 T cells for all HC and COVID-19 patients. (G) tSNE projection of non-naïve CD4  
1082 T cell populations (Pop) identified by FlowSOM clustering tool. (H) Fluorescence  
1083 intensity of each Pop as indicated in the column-scaled z-score and boxplot graphs  
1084 showing the frequencies of Pop0, Pop2, Pop6 and Pop10 in HC and COVID-19  
1085 patients. Boxplots show the median and 25<sup>th</sup> to 75<sup>th</sup> percentiles, and the whiskers denote  
1086 lowest and highest values. Each dot represents a donor. Significance of data in Fig. 2A,  
1087 2B, 2C, 2E and 2H was determined by the Kruskal-Wallis test followed by Dunn's  
1088 multiple comparison test. \*p <0.05, \*\*p <0.01, and \*\*\*p <0.001.  
1089

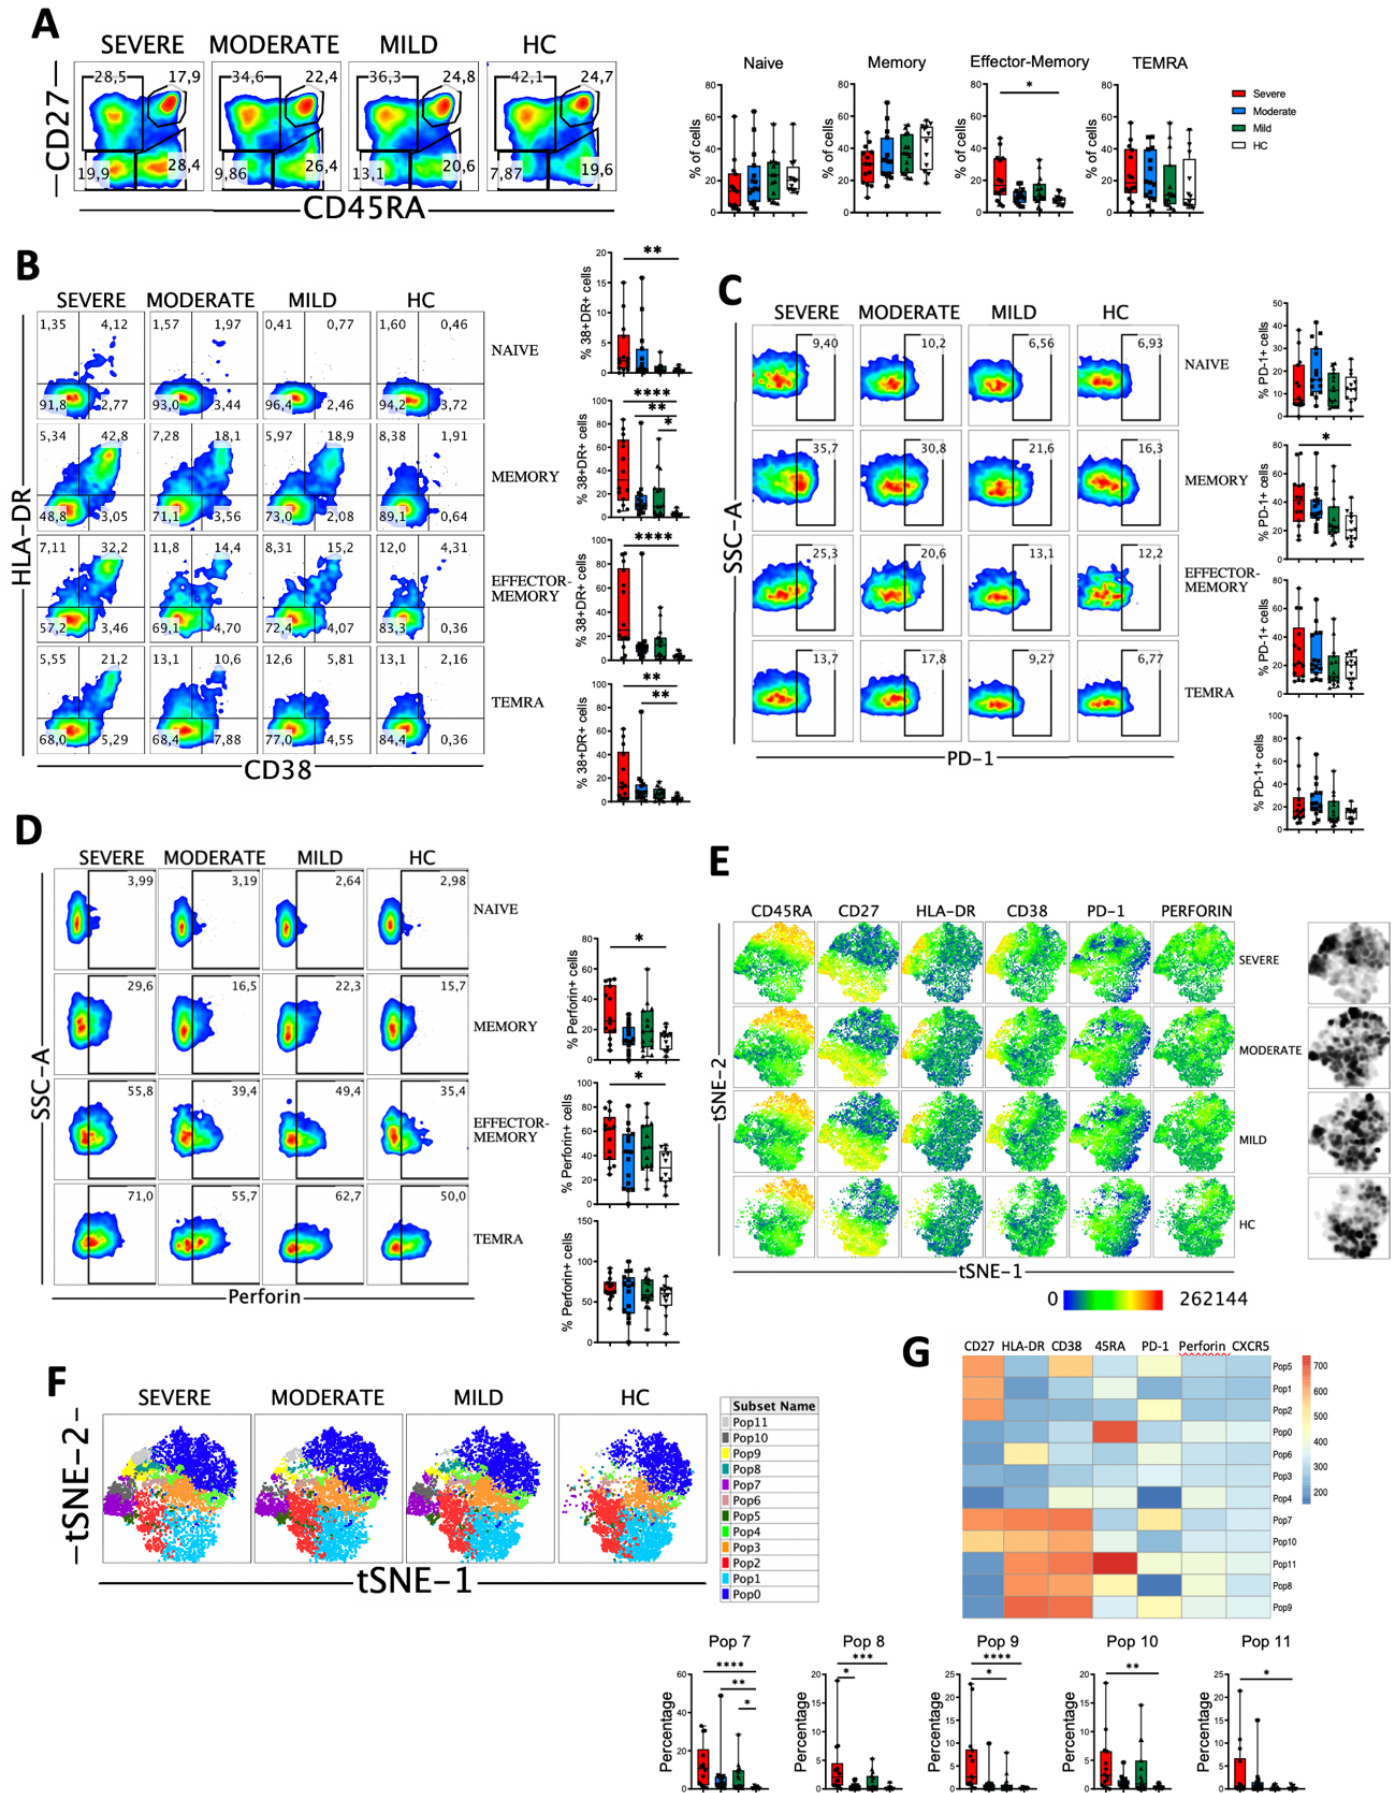

1091 **Fig. 3. CD8 T cell subsets, perforin expression and activated cells in COVID-19**  
1092 **patients. (A)** Left: pseudocolor plots of concatenated peripheral CD8 T cells from  
1093 healthy controls (HC) and patients with mild, moderate and severe COVID-19. Four  
1094 cell subsets were identified: naïve (CD27+CD45RA+), memory (CD27+CD45RA-),  
1095 effector-memory (CD27-CD45RA-), and terminal differentiated effector-memory  
1096 (TEMRA) (CD27-CD45RA+). Numbers in the gates are the average of each subset.  
1097 Right: boxplot graphs representation of the data. **(B).** Pseudocolor plots of concatenated  
1098 peripheral CD8 T cells from HC and COVID-19 patients and boxplot graphs of the  
1099 frequencies of activated naïve, memory, effector-memory and TEMRA cells. Numbers  
1100 in the quadrants are the average of each subset. Activated T cells are identified by the  
1101 coexpression of CD38 and HLA-DR. **(C)** Pseudocolor plots of concatenated peripheral  
1102 CD8 T cells and boxplot graphs showing the frequencies of PD-1+ naïve, memory,  
1103 effector-memory and TEMRA cells. Numbers in the gates are the average of PD-1+  
1104 cells in each subset. **(D)** Pseudocolor plots of concatenated peripheral CD8 T cells and  
1105 boxplot graphs of the frequencies of perforin positive naïve, memory, effector-memory  
1106 and TEMRA cells. Numbers in the gates are the average of perforin positive cells in  
1107 each subset. **(E)** tSNE projection of the indicated markers and density plots in non-naïve  
1108 CD8 T cells for all HC and COVID-19 patients. **(F)** tSNE projection of non-naïve CD8  
1109 T cell populations (Pop) identified by FlowSOM clustering tool. **(G)** Fluorescence  
1110 intensity of each Pop as indicated in the column-scaled z-score and boxplot graphs  
1111 showing the frequencies of Pop7, Pop8, Pop9, Pop10 and Pop11 in HC and COVID-19  
1112 patients. Boxplots show the median and 25<sup>th</sup> to 75<sup>th</sup> percentiles, and the whiskers denote  
1113 lowest and highest values. Each dot represents a donor. Significance of data in Fig. 3A,  
1114 3B, 3C, 3D and 3G was determined by the Kruskal-Wallis test followed by Dunn's  
1115 multiple comparison test. \*p <0.05, \*\*p <0.01, \*\*\*p <0.001, and \*\*\*\*p <0.0001.



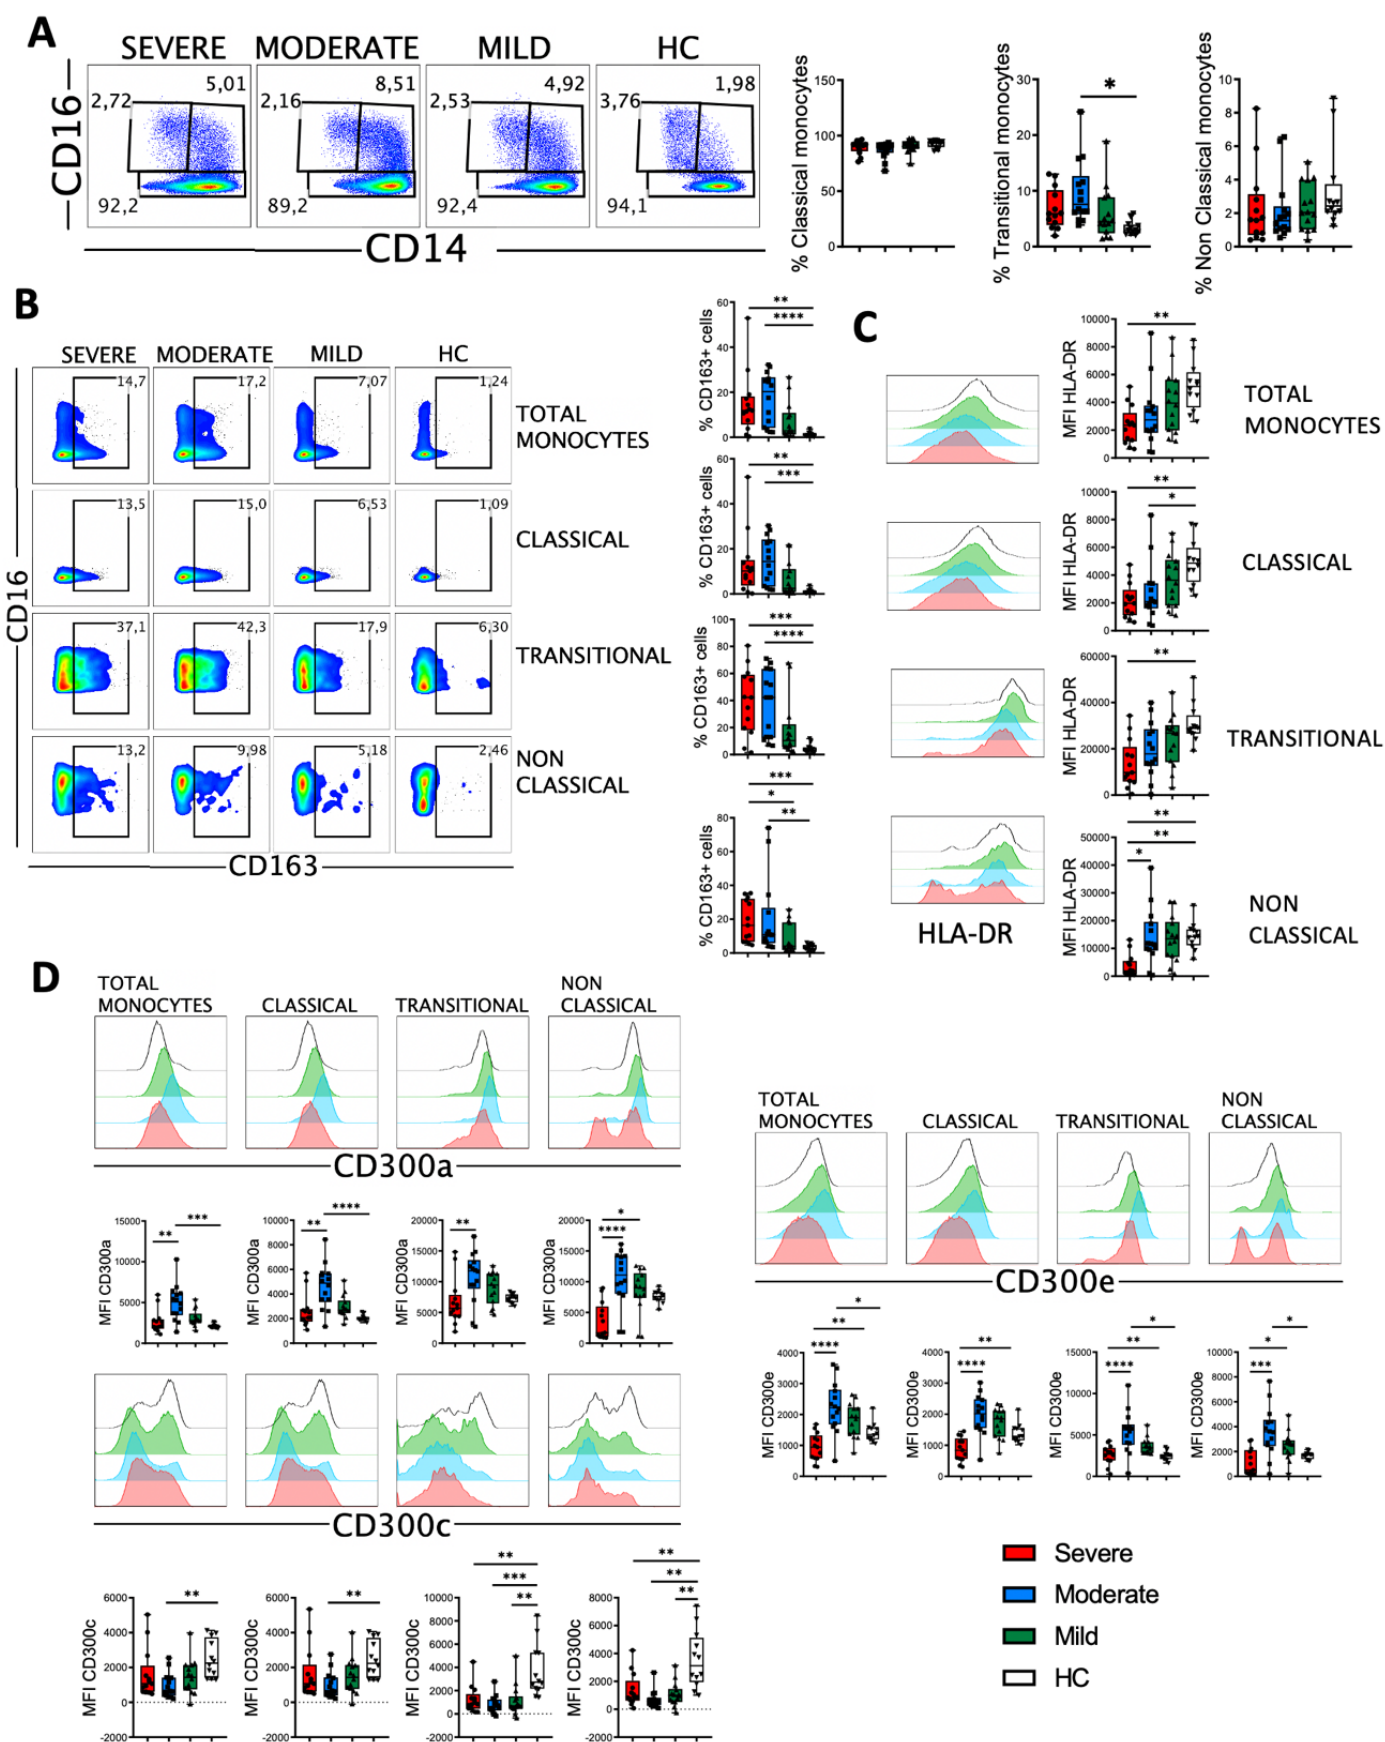

1117 **Fig. 4. CD163, HLA-DR and CD300 receptors expression in monocytes from**  
1118 **COVID-19 patients.** (A) Pseudocolor plots of concatenated monocytes cells from  
1119 healthy controls (HC) and patients and boxplot graphs of the frequencies of classical  
1120 (CD14++CD16-), transitional (CD14++CD16+) and non-classical (CD14+CD16++)  
1121 monocyte subsets. Numbers in the gates are the average of each subset. (B) Pseudocolor  
1122 plots of all concatenated monocytes and subsets and boxplot graphs showing the  
1123 frequencies of CD163+ cells. Numbers in the gates are the average of CD163+ cells in  
1124 each subset. (C) Histograms of concatenated monocytes and boxplot graphs showing  
1125 the median fluorescence intensity (MFI) of HLA-DR in all and each monocyte subset.  
1126 (D) Histograms of concatenated monocytes and boxplot graphs of the MFI of CD300a,  
1127 CD300c and CD300e in all and each monocyte subset. Boxplots show the median and  
1128 25<sup>th</sup> to 75<sup>th</sup> percentiles, and the whiskers denote lowest and highest values. Each dot  
1129 represents a donor. Significance of data was determined by the Kruskal-Wallis test  
1130 followed by Dunn's multiple comparison test. \*p <0.05, \*\*p <0.01, \*\*\*p <0.001, and  
1131 \*\*\*\*p <0.0001.  
1132

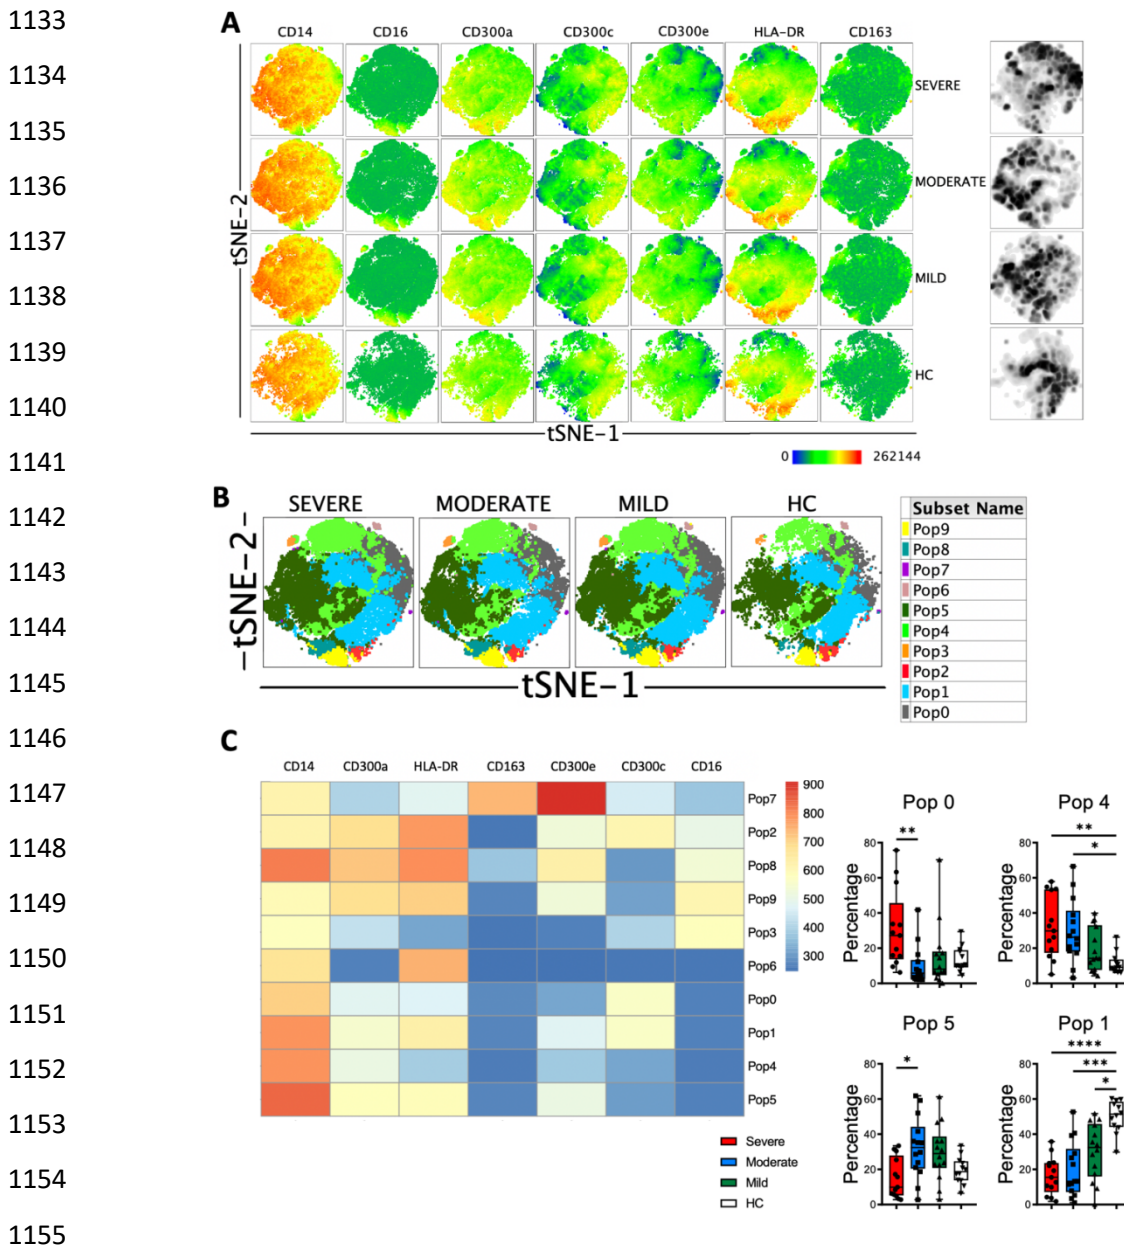

1156 **Fig. 5. Unsupervised analysis of monocytes in COVID-19 patients.** (A) tSNE  
 1157 projection of the indicated markers and density plots in monocytes for all HC and  
 1158 COVID-19 patients. (B) tSNE projection of monocyte populations (Pop) identified by  
 1159 FlowSOM clustering tool. (C) Fluorescence intensity of each Pop as indicated in the  
 1160 column-scaled z-score and boxplot graphs showing the frequencies of Pop0, Pop1, Pop4  
 1161 and Pop5 in HC and COVID-19 patients. Boxplots show the median and 25th to 75th  
 1162 percentiles, and the whiskers denote lowest and highest values. Each dot represents a  
 1163 donor. Significance of data was determined by the Kruskal-Wallis test followed by  
 1164 Dunn's multiple comparison test. \* $p < 0.05$ , \*\* $p < 0.01$ , \*\*\* $p < 0.001$ , and \*\*\*\* $p$   
 1165  $< 0.0001$ .

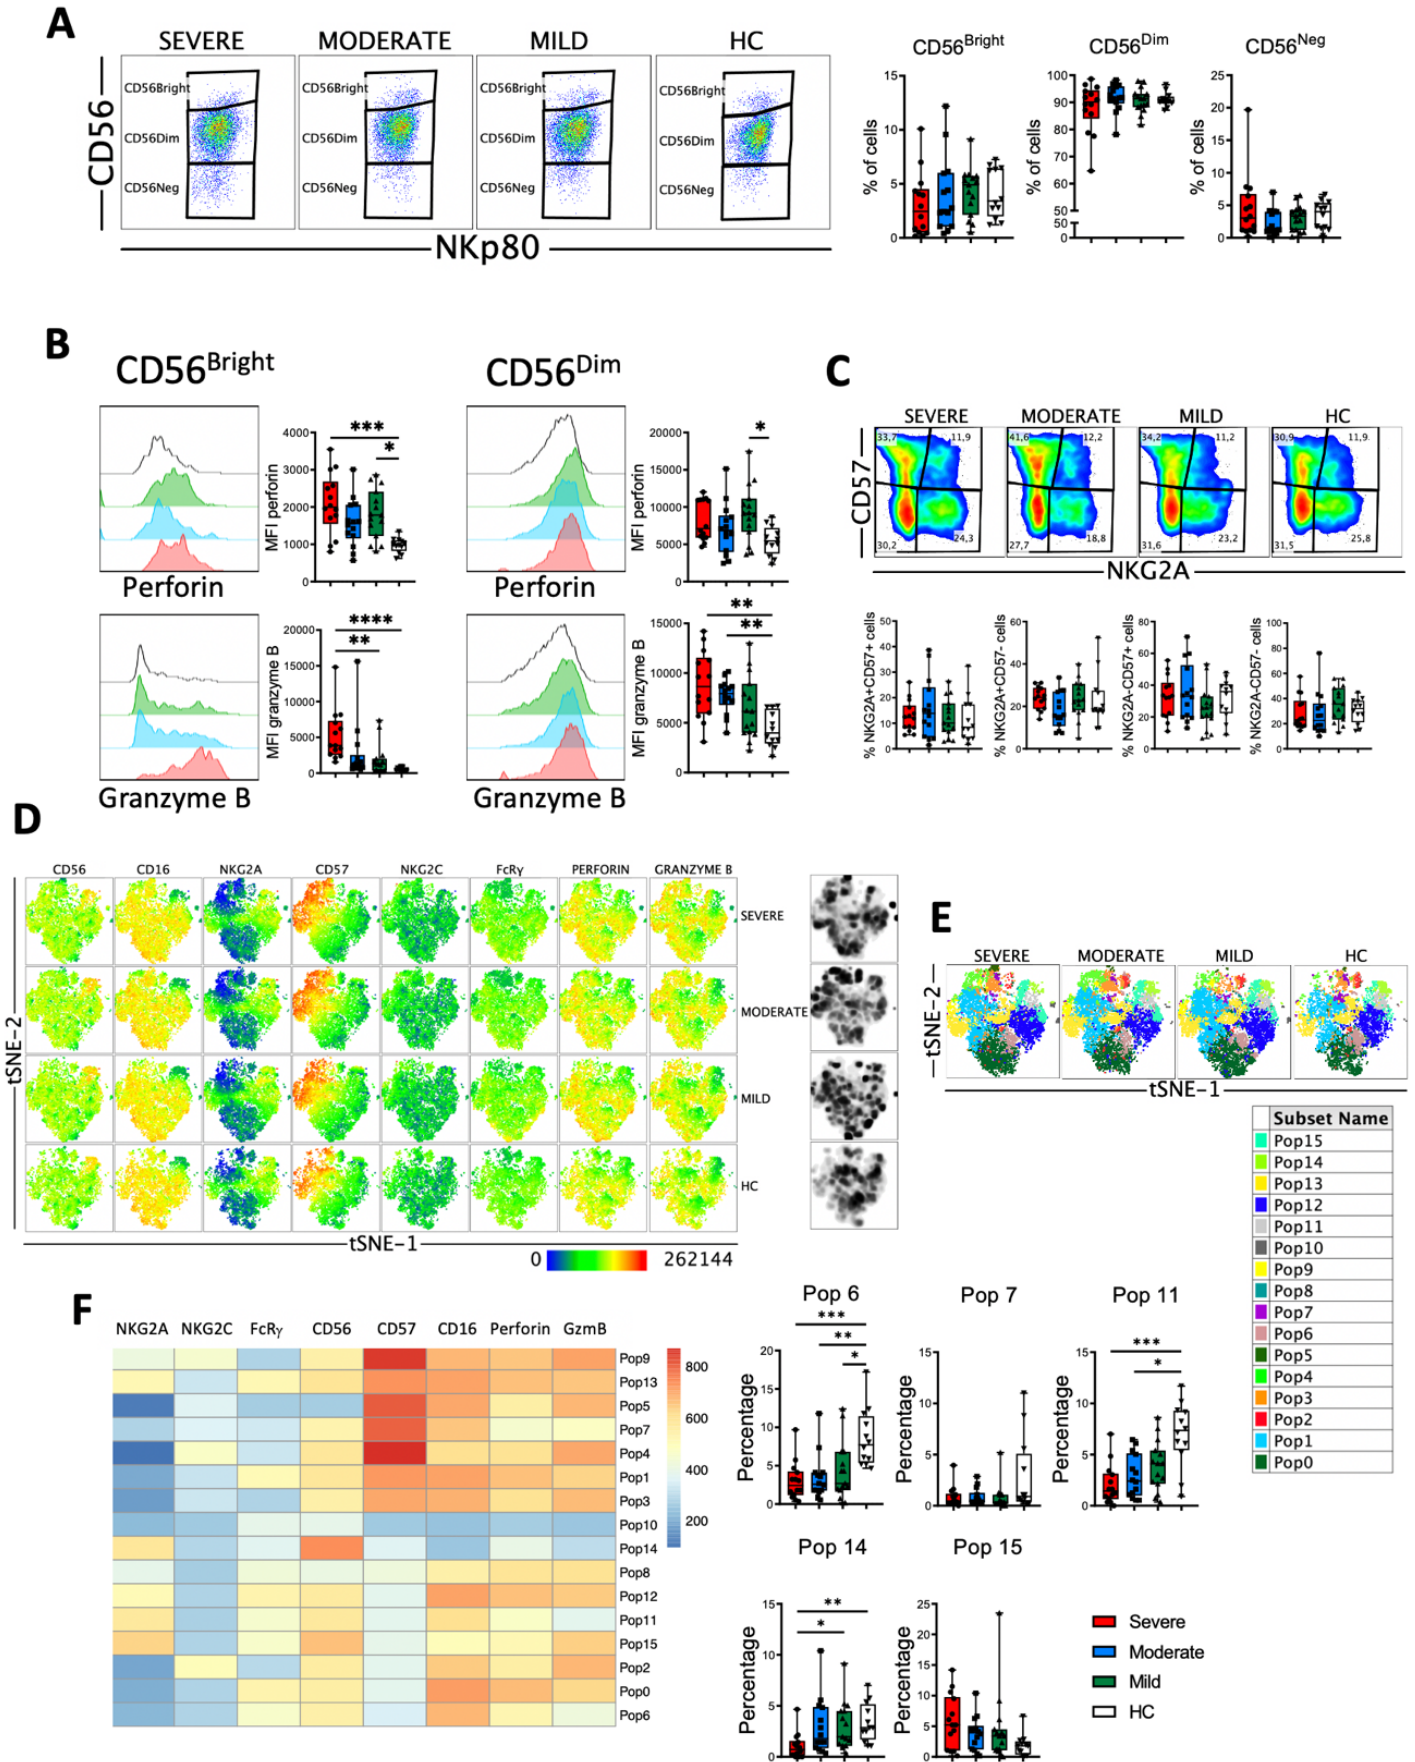

1167 **Fig. 6. Perforin and granzyme B expression in NK cell subsets from COVID-19**  
1168 **patients. (A)** Pseudocolor plots of concatenated NK cells from healthy controls (HC)  
1169 and patients and boxplot graphs of the frequencies of CD56<sup>bright</sup> (CD56<sup>++</sup>NKp80+),  
1170 CD56<sup>dim</sup> (CD56<sup>+</sup>NKp80+) and CD56<sup>neg</sup> (CD56<sup>-</sup>NKp80+) NK cell subsets. **(B)**  
1171 Histograms of concatenated CD56<sup>bright</sup> (left) and CD56<sup>dim</sup> (right) NK cells and boxplot  
1172 graphs of the median fluorescence intensity (MFI) of perforin (upper) and granzyme B  
1173 (lower). **(C)** Pseudocolor plots of concatenated CD56<sup>dim</sup> NK cells from HC and patients  
1174 and boxplot graphs of the frequencies of the four subsets based in the expression of the  
1175 CD57 and NKG2A differentiation markers. Numbers in the gates are the average of  
1176 each subset. **(D)** tSNE projection of the indicated markers and density plots in NK cells  
1177 for all HC and COVID-19 patients. **(E)** tSNE projection of NK cells populations (Pop)  
1178 identified by FlowSOM clustering. **(F)** Fluorescence intensity of each Pop as indicated  
1179 in the column-scaled z-score and boxplot graphs showing the frequencies of Pop6,  
1180 Pop7, Pop11, Pop14 and Pop15 in HC and COVID-19 patients. Boxplots show the  
1181 median and 25<sup>th</sup> to 75<sup>th</sup> percentiles, and the whiskers denote lowest and highest values.  
1182 Each dot represents a donor. Significance of data in Fig. 6A, 6B and 6C was determined  
1183 by the Kruskal-Wallis test followed by Dunn's multiple comparison test. \*p <0.05, \*\*p  
1184 <0.01, \*\*\*p <0.001, and \*\*\*\*p <0.0001.

1185

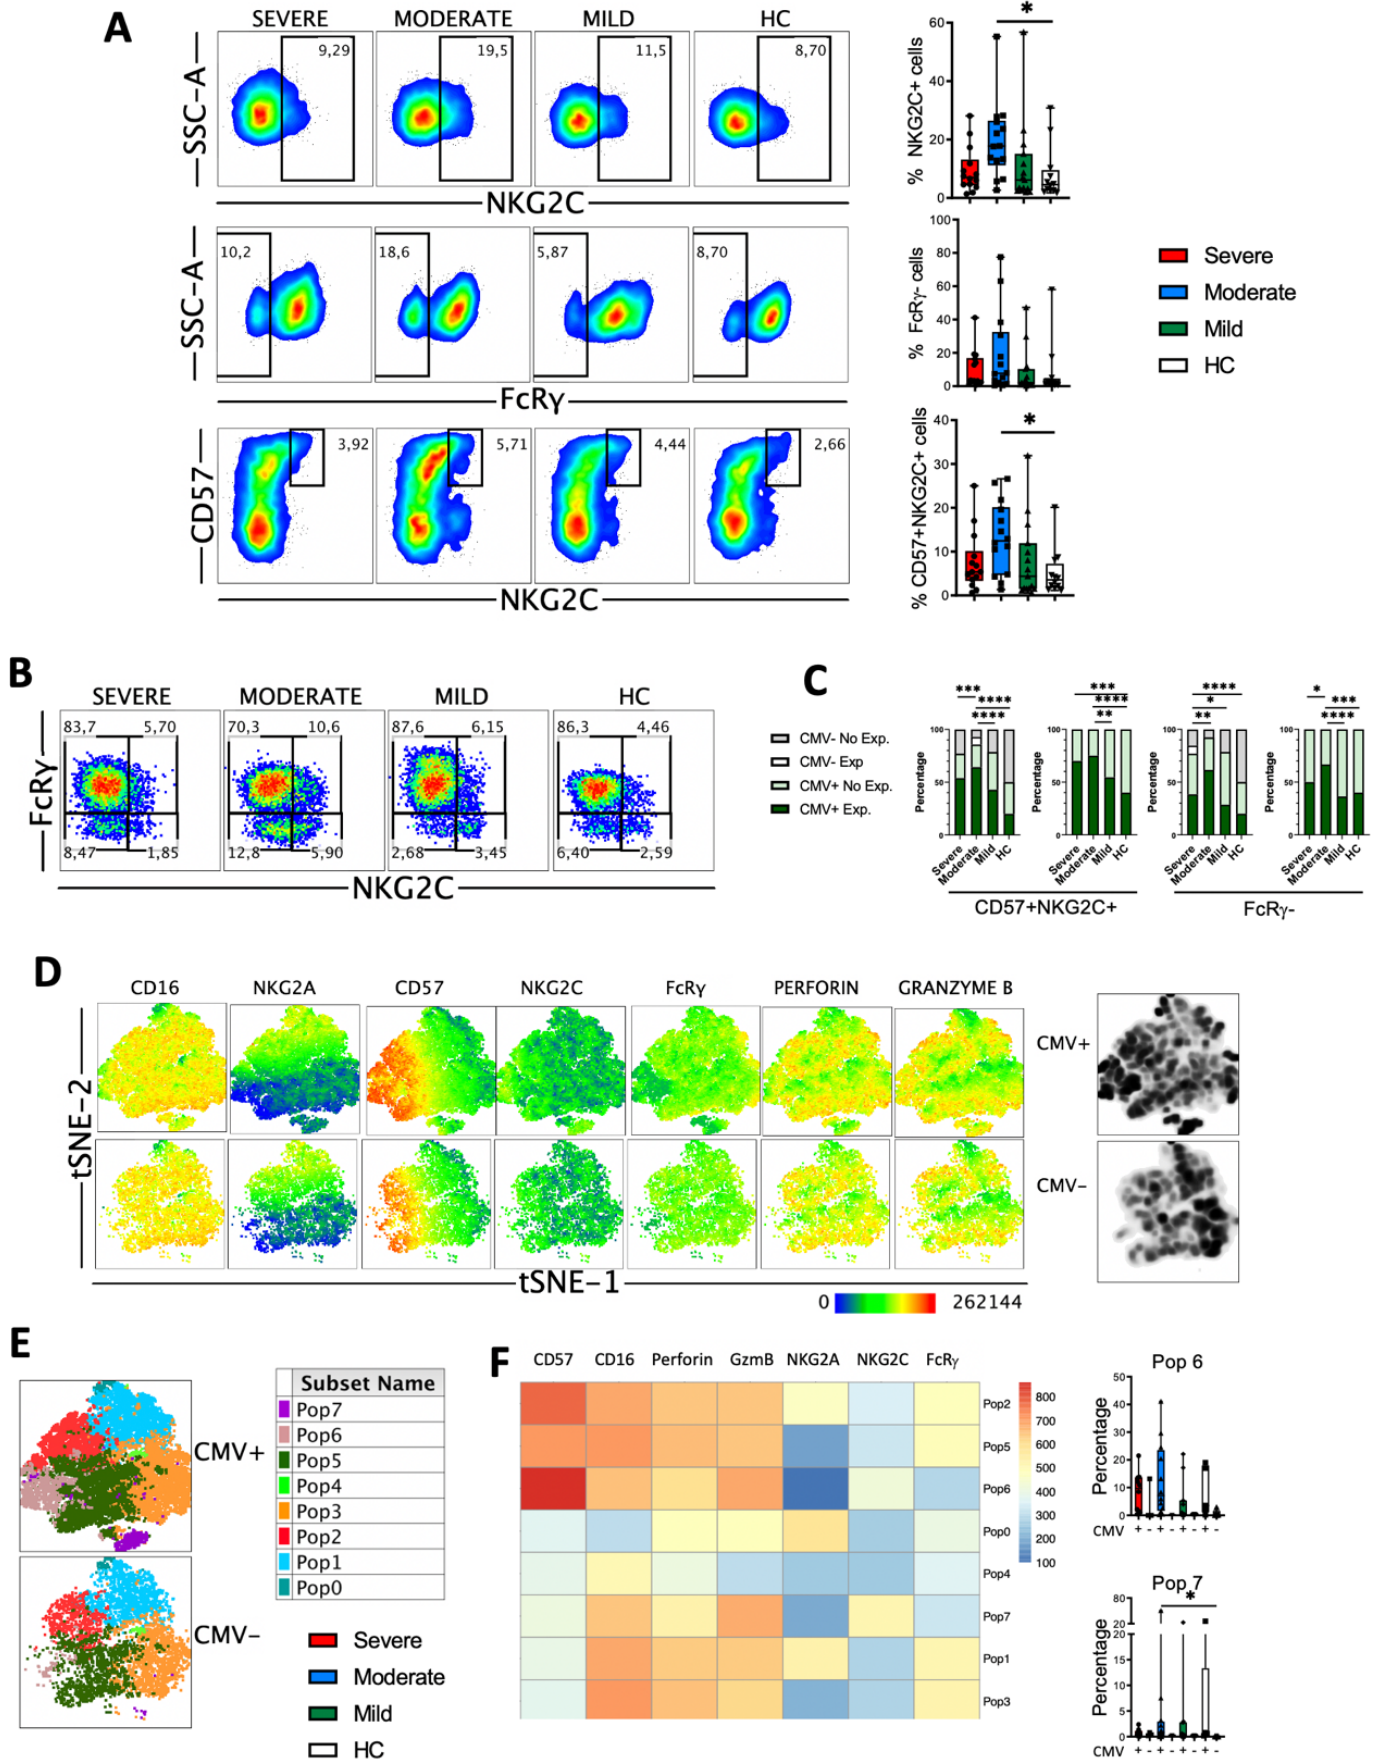

1187 **Fig. 7. Adaptive NK cells in COVID-19.** (A) Pseudocolor plots of concatenated  
1188 CD56<sup>dim</sup> NK cells from healthy controls (HC) and patients and boxplot graphs of the  
1189 frequencies of NKG2C<sup>+</sup>, FcR $\gamma$ <sup>-</sup> and CD57<sup>+</sup>NKG2C<sup>+</sup> NK cell subsets. Numbers in the  
1190 gates are the average of each subset. Boxplots show the median and 25th to 75th  
1191 percentiles, and the whiskers denote lowest and highest values. Each dot represents a  
1192 donor. Significance of data was determined by the Kruskal-Wallis test followed by  
1193 Dunn's multiple comparison test. \*p <0.05. (B) Pseudocolor plots of concatenated  
1194 CD56<sup>dim</sup> NK cells from healthy controls (HC) and COVID-19 patients showing the  
1195 expression of NKG2C and FcR $\gamma$ . Numbers in the quadrants are the average of each  
1196 subset. (C) Percentage of individuals from the indicated groups having or not having  
1197 adaptive NK cell expansions. Significance of data was determined by chi-squared test.  
1198 \*p <0.05, \*\*p <0.01, \*\*\*p <0.001, and \*\*\*\*p <0.0001. (D) tSNE projection of the  
1199 indicated markers and density plots in CD56<sup>dim</sup> NK cells from CMV-seropositive  
1200 (CMV<sup>+</sup>) and CMV-seronegative (CMV<sup>-</sup>) individuals. (E) tSNE projection of CD56<sup>dim</sup>  
1201 NK cells populations (Pop) identified by FlowSOM clustering tool from CMV<sup>+</sup> and  
1202 CMV<sup>-</sup> donors. (F) Fluorescence intensity of each Pop as indicated in the column-scaled  
1203 z-score and boxplot graphs showing the frequencies of Pop6 and Pop7 in CMV<sup>+</sup> and  
1204 CMV<sup>-</sup> HC and COVID-19 patients. Each dot represents a donor.  
1205

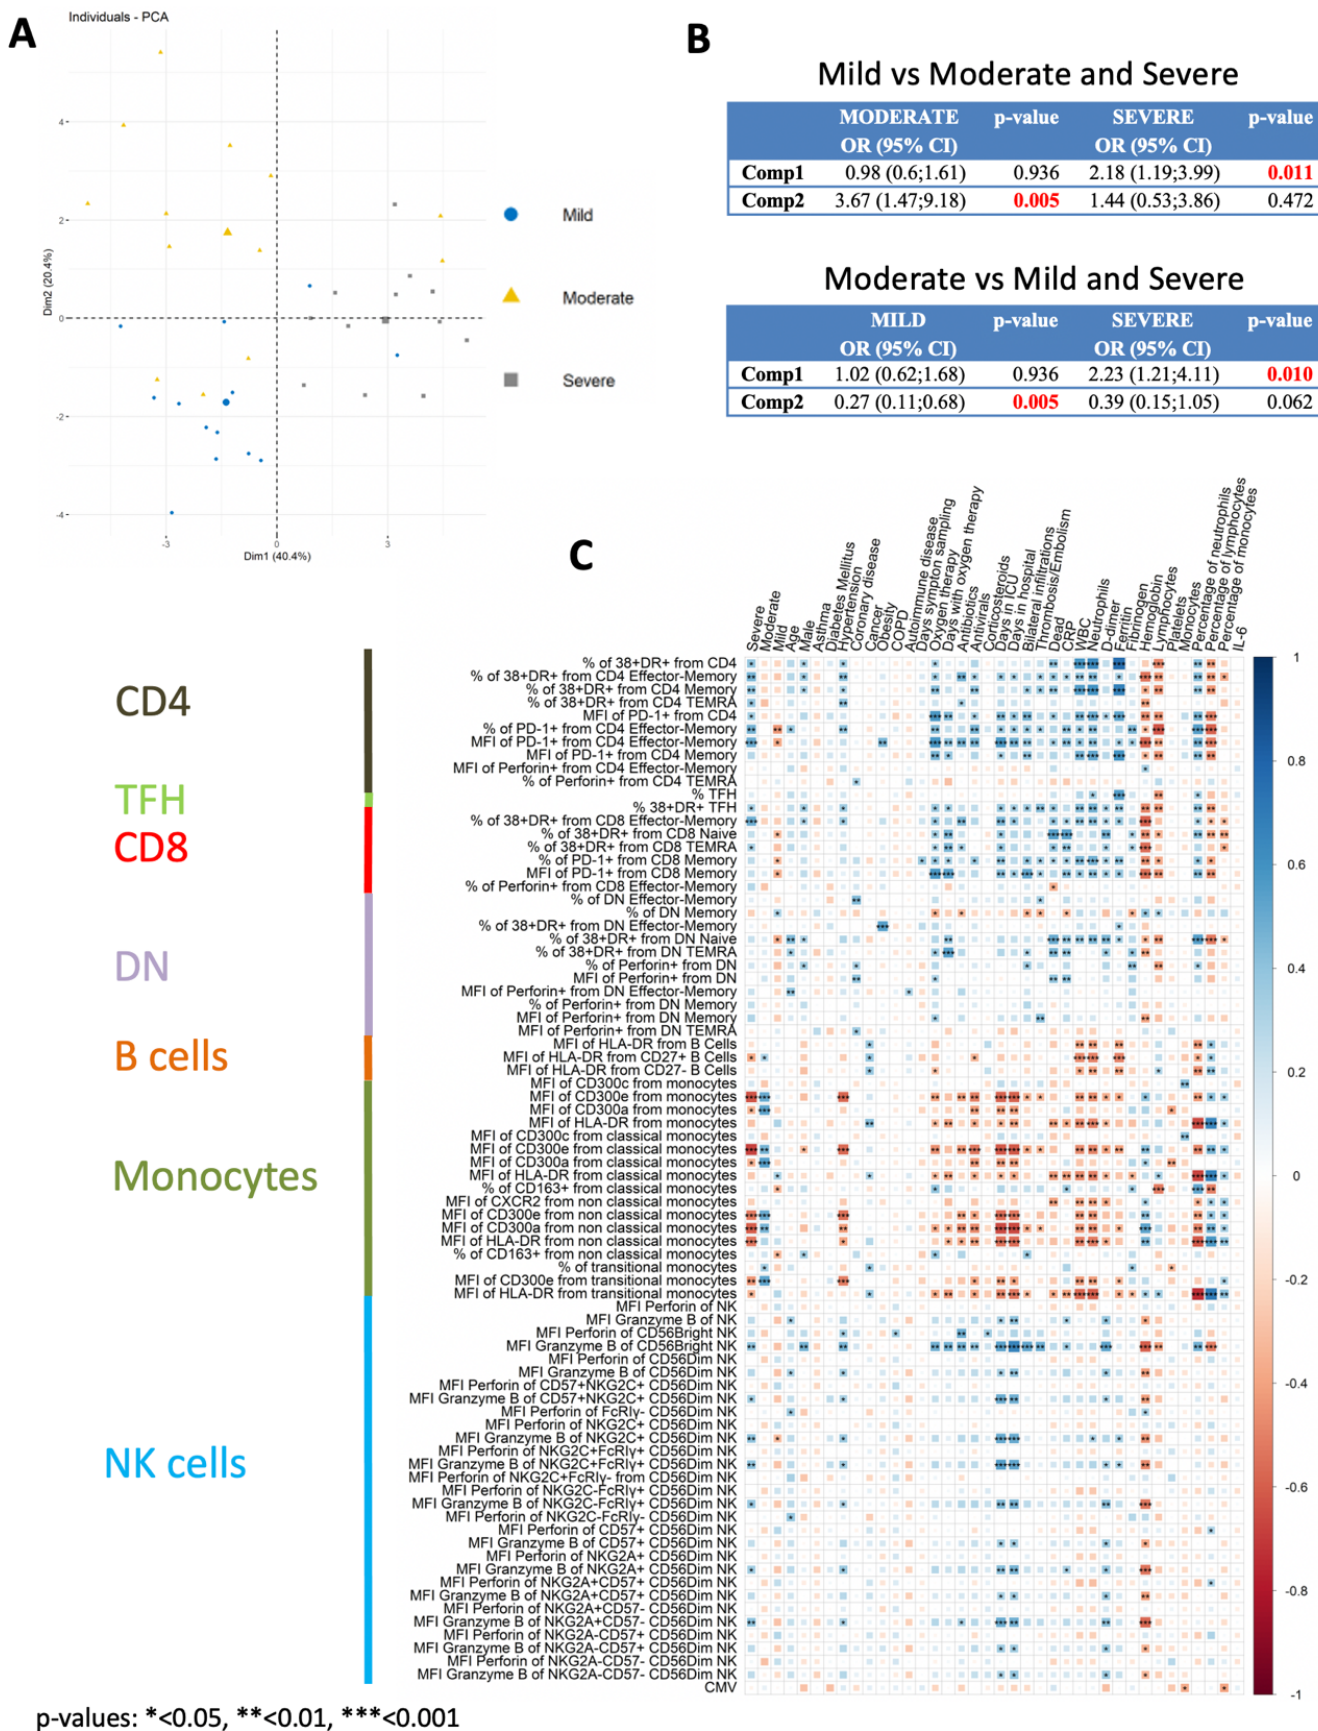



1207 **Fig. 8. Multivariate analysis and correlation studies of immune cell phenotypes and**  
1208 **clinical parameters.** (A) Representation of the principal component analysis (PCA)  
1209 results obtained with the most discriminant markers between patients groups. (B)  
1210 Multinomial logistic regression model and statistical significance. Upper: Patients with  
1211 mild disease versus patients with moderate and severe disease. Lower: Patients with  
1212 moderate disease versus patients with mild and severe disease. Odd ratio (OR), 95%  
1213 confidence interval (CI) and p-values are indicated. (C) Correlogram showing  
1214 Spearman correlation of the indicated flow cytometry data and clinical features for  
1215 COVID-19 patients. Only flow cytometry data that were statistically significant from  
1216 the bivariate analysis (Table S3) were considered for the analysis.
